# Supplementary material for: Mechanical insights into the oxidative cleavage of resveratrol catalyzed by dioxygenase NOV1 from Novosphingobium aromaticivorans: confirmation of dioxygenase mechanism by QM/MM calculations
Source: Royal Society of Chemistry journal article supplement (doi:10.1039/c8cy01885e), 2018-12-10
Supplement: c8cy01885e1.pdf [file c8cy01885e1.pdf]

## Supporting information

### Mechanical insights into the oxidative cleavage of resveratrol catalyzed by dioxygenase NOV1 from *Novosphingobium aromaticivorans*: confirmation of dioxygenase mechanism by QM/MM calculations

Jie Bai<sup>a</sup>, Qianqian Hou<sup>b</sup>, Wenyu Zhu<sup>c</sup>, Yongjun Liu<sup>a,\*</sup>

<sup>a</sup>Key Lab of Colloid and Interface Chemistry, Ministry of Education, School of Chemistry and Chemical Engineering, Shandong University, Jinan, Shandong 250100, China

<sup>b</sup>Shandong Non-metallic Materials Institute, Jinan, Shandong 250100, China

<sup>c</sup>College of Chemistry and Chemical Engineering, Xuzhou Institute of Technology, Xuzhou, Jiangsu 221111, China

Corresponding Author: Tel.: +86 53188365576; fax: +86 53188564464. Email address: yongjunliu\_1@sdu.edu.cn (Y. Liu).

Table S1 Key coordinate distances of optimized reactant models at the triplet and quintet (showed in parentheses) spin states calculated at B3LYP/6-31G (d,p) basis set.

| species     | side-on     | end-on I    | end-on II   | end-on III  |
|-------------|-------------|-------------|-------------|-------------|
| r (Fe-H284) | 2.00 (2.12) | 2.05 (2.15) | 2.07 (2.15) | 2.06 (2.14) |
| r (Fe-H476) | 1.98 (1.96) | 1.98 (1.99) | 1.99 (2.01) | 1.99 (1.99) |
| r (Fe-H167) | 1.99 (2.12) | 2.00 (1.99) | 2.01 (1.97) | 2.01 (2.00) |
| r (Fe-H218) | 2.02 (1.98) | 2.01 (2.02) | 2.02 (2.02) | 2.02 (2.02) |

Table S2 Spin densities of key atoms in involved species in path\_a, path\_b1 and path\_b2 at the B3LYP/6-311++G (2d,2p) basis set.

|                   | Fe   | O1    | O2    | C1   | C2    |
|-------------------|------|-------|-------|------|-------|
| <sup>3</sup> Re   | 3.34 | -0.65 | -0.83 | 0    | -0.02 |
| <sup>3</sup> IM1a | 0.87 | 0.14  | 0.05  | 0.61 | -0.01 |
| <sup>3</sup> IM2a | 1.97 | 0     | 0.01  | 0    | 0     |
| <sup>3</sup> IM3a | 0.93 | 0.75  | 0.08  | 0.01 | 0.02  |
| <sup>3</sup> Pa   | 1.96 | 0     | 0     | 0    | 0     |
|                   |      |       |       |      |       |
|                   | Fe   | O1    | O2    | C1   | C2    |
| <sup>5</sup> Re   | 2.43 | 0.71  | 0.76  | 0    | 0     |
| <sup>5</sup> IM1a | 3.57 | -0.26 | -0.17 | 0.45 | -0.01 |
| <sup>5</sup> IM2a | 3.73 | 0     | 0.03  | 0    | 0     |
| <sup>5</sup> IM3a | 2.77 | 0.75  | 0.15  | 0.01 | 0.04  |

|                                |      |       |       |       |       |
|--------------------------------|------|-------|-------|-------|-------|
| <sup>5</sup> Pa                | 3.73 | 0     | 0.03  | 0     | 0     |
|                                | Fe   | O1    | O2    | C1    | C2    |
| <sup>3</sup> Re                | 3.34 | -0.65 | -0.83 | -0.02 | 0     |
| <sup>3</sup> IM1 <sub>b</sub>  | 2.69 | 0.10  | 0.01  | 0     | -0.62 |
| <sup>3</sup> IM2 <sub>b1</sub> | 2.82 | 0.06  | -0.03 | -0.01 | -0.56 |
| <sup>3</sup> IM3 <sub>b1</sub> | 1.98 | 0.01  | 0     | 0     | 0     |
| <sup>3</sup> IM4 <sub>b1</sub> | 0.93 | 0.09  | 0.76  | 0     | 0.01  |
| <sup>3</sup> P <sub>b1</sub>   | 1.96 | 0     | 0     | 0     | 0     |
|                                | Fe   | O1    | O2    | C1    | C2    |
| <sup>5</sup> Re                | 2.43 | 0.71  | 0.76  | 0     | 0     |
| <sup>5</sup> IM1 <sub>b</sub>  | 3.71 | 0.28  | 0.19  | 0     | -0.23 |
| <sup>5</sup> IM2 <sub>b1</sub> | 3.87 | 0.54  | 0.23  | 0     | -0.55 |
| <sup>5</sup> IM3 <sub>b1</sub> | 3.73 | 0.03  | 0     | 0     | 0     |
| <sup>5</sup> IM4 <sub>b1</sub> | 2.78 | 0.14  | 0.76  | 0.01  | 0.04  |
| <sup>5</sup> P <sub>b1</sub>   | 3.73 | 0.03  | 0     | 0     | 0     |
|                                | Fe   | O1    | O2    | C1    | C2    |
| <sup>3</sup> Re                | 3.34 | -0.65 | -0.83 | 0     | -0.02 |
| <sup>3</sup> IM1 <sub>b</sub>  | 2.61 | 0.16  | 0.02  | 0     | -0.65 |
| <sup>3</sup> IM2 <sub>b2</sub> | 1.43 | 0.58  | 0     | 0     | 0     |
| <sup>3</sup> IM3 <sub>b2</sub> | 0.97 | 0.04  | 0.78  | 0     | 0.07  |
| <sup>3</sup> P <sub>b2</sub>   | 1.96 | 0     | 0     | 0     | 0     |
|                                | Fe   | O1    | O2    | C1    | C2    |
| <sup>5</sup> Re                | 2.43 | 0.71  | 0.76  | 0     | 0     |
| <sup>5</sup> IM1 <sub>b</sub>  | 3.67 | 0.32  | 0.20  | 0.01  | -0.27 |
| <sup>5</sup> IM2 <sub>b2</sub> | 3.16 | 0.65  | 0     | 0     | 0     |
| <sup>5</sup> IM3 <sub>b2</sub> | 2.77 | 0.14  | 0.78  | -0.01 | 0.07  |
| <sup>5</sup> P <sub>b2</sub>   | 3.73 | 0.03  | 0     | 0     | 0     |

Table S3 Natural population atomic charges of key atoms in involved species in path\_a, path\_b1 and path\_b2 at the B3LYP/6-311++G (2d,2p) basis set.

|                               |      |       |       |      |
|-------------------------------|------|-------|-------|------|
|                               | Fe   | O1    | O2    | Sub  |
| <sup>3</sup> Re               | 1.45 | -0.19 | -0.04 | 0.17 |
| <sup>3</sup> TS1 <sub>a</sub> | 1.46 | -0.31 | -0.22 | 0.50 |
| <sup>3</sup> IM1 <sub>a</sub> | 1.21 | -0.38 | -0.34 | 0.48 |
| <sup>3</sup> TS2 <sub>a</sub> | 1.35 | -0.41 | -0.35 | 0.74 |
| <sup>3</sup> IM2 <sub>a</sub> | 1.20 | -0.29 | -0.36 | 0.85 |
| <sup>3</sup> TS3 <sub>a</sub> | 1.35 | -0.39 | -0.50 | 0.77 |
| <sup>3</sup> IM3 <sub>a</sub> | 1.28 | -0.37 | -0.68 | 0.77 |
| <sup>3</sup> TS4 <sub>a</sub> | 1.29 | -0.51 | -0.68 | 0.84 |

|                 |      |       |       |      |
|-----------------|------|-------|-------|------|
| <sup>3</sup> Pa | 1.21 | -0.62 | -0.66 | 1.44 |
|-----------------|------|-------|-------|------|

|                   | Fe   | O1    | O2    | Sub  |
|-------------------|------|-------|-------|------|
| <sup>5</sup> Re   | 1.36 | -0.17 | -0.11 | 0.14 |
| <sup>5</sup> TS1a | 1.48 | -0.32 | -0.16 | 0.58 |
| <sup>5</sup> IM1a | 1.49 | -0.41 | -0.20 | 0.70 |
| <sup>5</sup> TS2a | 1.51 | -0.46 | -0.33 | 0.82 |
| <sup>5</sup> IM2a | 1.50 | -0.31 | -0.36 | 0.82 |
| <sup>5</sup> TS3a | 1.77 | -0.39 | -0.62 | 0.73 |
| <sup>5</sup> IM3a | 1.48 | -0.36 | -0.72 | 0.77 |
| <sup>5</sup> TS4a | 1.49 | -0.51 | -0.71 | 0.84 |
| <sup>5</sup> Pa   | 1.51 | -0.61 | -0.68 | 1.41 |

|                    | Fe   | O1    | O2    | Sub  |
|--------------------|------|-------|-------|------|
| <sup>3</sup> Re    | 1.45 | -0.19 | -0.04 | 0.17 |
| <sup>3</sup> TS1b  | 1.46 | -0.32 | -0.20 | 0.46 |
| <sup>3</sup> IM1b  | 1.42 | -0.41 | -0.35 | 0.49 |
| <sup>3</sup> TS2b1 | 1.47 | -0.39 | -0.34 | 0.48 |
| <sup>3</sup> IM2b1 | 1.48 | -0.39 | -0.34 | 0.48 |
| <sup>3</sup> TS3b1 | 1.44 | -0.40 | -0.33 | 0.52 |
| <sup>3</sup> IM3b1 | 1.20 | -0.36 | -0.29 | 0.85 |
| <sup>3</sup> TS4b1 | 1.36 | -0.51 | -0.39 | 0.77 |
| <sup>3</sup> IM4b1 | 1.38 | -0.69 | -0.36 | 0.77 |
| <sup>3</sup> TS5b1 | 1.37 | -0.69 | -0.48 | 0.83 |
| <sup>3</sup> Pb1   | 1.20 | -0.65 | -0.63 | 1.43 |

|                    | Fe   | O1    | O2    | Sub  |
|--------------------|------|-------|-------|------|
| <sup>5</sup> Re    | 1.36 | -0.17 | -0.11 | 0.14 |
| <sup>5</sup> TS1b  | 1.48 | -0.31 | -0.16 | 0.62 |
| <sup>5</sup> IM1b  | 1.48 | -0.47 | -0.22 | 0.85 |
| <sup>5</sup> TS2b1 | 1.59 | -0.35 | -0.19 | 0.51 |
| <sup>5</sup> IM2b1 | 1.59 | -0.33 | -0.20 | 0.50 |
| <sup>5</sup> TS3b1 | 1.61 | -0.49 | -0.29 | 0.74 |
| <sup>5</sup> IM3b1 | 1.49 | -0.35 | -0.31 | 0.80 |
| <sup>5</sup> TS4b1 | 1.77 | -0.62 | -0.40 | 0.72 |
| <sup>5</sup> IM4b1 | 1.48 | -0.72 | -0.36 | 0.77 |
| <sup>5</sup> TS5b1 | 1.50 | -0.72 | -0.51 | 0.84 |
| <sup>5</sup> Pb1   | 1.51 | -0.67 | -0.61 | 1.38 |

|                    | Fe   | O1    | O2    | Sub  |
|--------------------|------|-------|-------|------|
| <sup>3</sup> IM1b  | 1.42 | -0.41 | -0.35 | 0.49 |
| <sup>3</sup> TS2b2 | 1.21 | -0.50 | -0.28 | 0.97 |
| <sup>3</sup> IM2b2 | 1.17 | -0.42 | -0.55 | 0.69 |

|                                |      |       |       |      |
|--------------------------------|------|-------|-------|------|
| <sup>3</sup> TS3 <sub>b2</sub> | 1.20 | -0.54 | -0.52 | 0.94 |
| <sup>3</sup> IM3 <sub>b2</sub> | 1.29 | -0.70 | -0.35 | 0.76 |
| <sup>3</sup> TS4 <sub>b2</sub> | 1.46 | -0.71 | -0.48 | 0.85 |
| P <sub>b2</sub>                | 1.20 | -0.65 | -0.63 | 1.43 |

  

|                                | Fe   | O1    | O2    | Sub  |
|--------------------------------|------|-------|-------|------|
| <sup>5</sup> IM1 <sub>b</sub>  | 1.48 | -0.47 | -0.22 | 0.85 |
| <sup>5</sup> TS2 <sub>b2</sub> | 1.58 | -0.61 | -0.32 | 0.91 |
| <sup>5</sup> IM2 <sub>b2</sub> | 1.47 | -0.47 | -0.55 | 0.69 |
| <sup>5</sup> TS3 <sub>b2</sub> | 1.66 | -0.71 | -0.47 | 0.95 |
| <sup>5</sup> IM3 <sub>b2</sub> | 1.47 | -0.72 | -0.35 | 0.77 |
| <sup>5</sup> TS4 <sub>b2</sub> | 1.49 | -0.72 | -0.44 | 0.83 |
| P <sub>b2</sub>                | 1.51 | -0.66 | -0.62 | 1.38 |

Table S4 Spin densities of key atoms in involved species in path\_a at the B3LYP/6-311++G (2d,2p) basis set.

|                               | Fe   | O1    | O2    | C1    | C2    | Sub   |
|-------------------------------|------|-------|-------|-------|-------|-------|
| <sup>3</sup> R <sub>P</sub>   | 3.18 | -0.59 | -0.76 | -0.01 | 0     | -0.01 |
| <sup>3</sup> TS1 <sub>P</sub> | 2.92 | -0.17 | -0.36 | -0.38 | 0.08  | -0.54 |
| <sup>3</sup> IM1 <sub>P</sub> | 0.89 | 0.13  | 0.06  | 0.61  | -0.01 | 0.94  |
| <sup>5</sup> R <sub>P</sub>   | 3.12 | 0.29  | 0.42  | 0     | 0     | 0     |
| <sup>5</sup> TS1 <sub>P</sub> | 3.56 | -0.28 | -0.13 | 0.42  | -0.04 | 0.65  |
| <sup>5</sup> IM1 <sub>P</sub> | 2.91 | -0.03 | 0.03  | 0.61  | -0.01 | 0.93  |

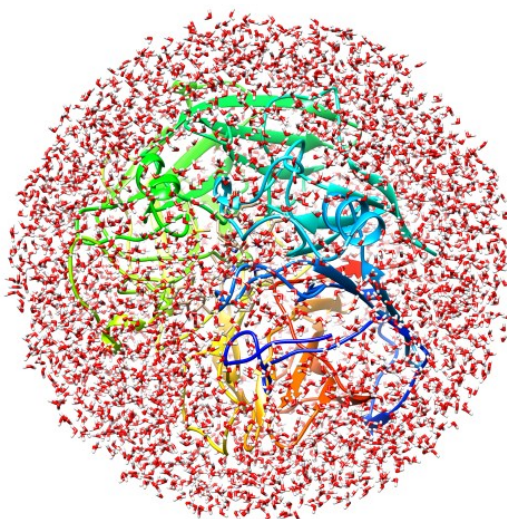

Figure S1 Constructed solvation model for the MD simulation.

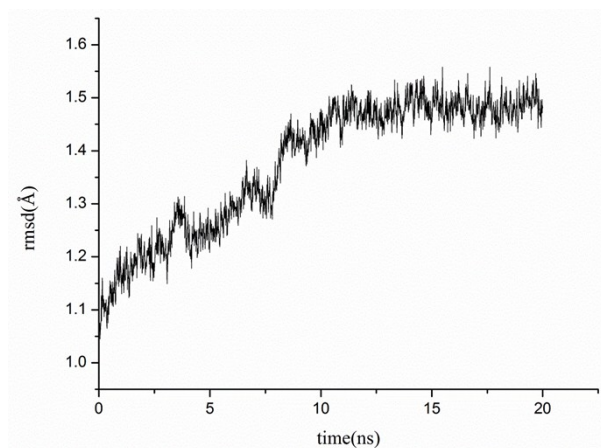

Figure S2 RMSD for the backbone atoms of the enzyme-substrate complex in 20 ns MD simulations.

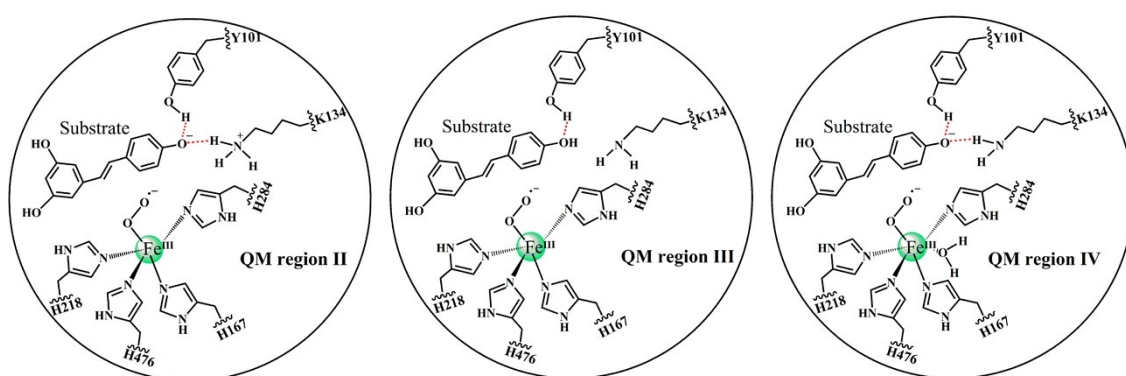

Figure S3 QM-region II (contains a protonated K134), QM-region III (4'-OH of substrate in neutral form) and QM-region IV (contains a coordinate water molecule) created in the QM/MM calculation. Possible hydrogen bonds are shown by red dashed lines.

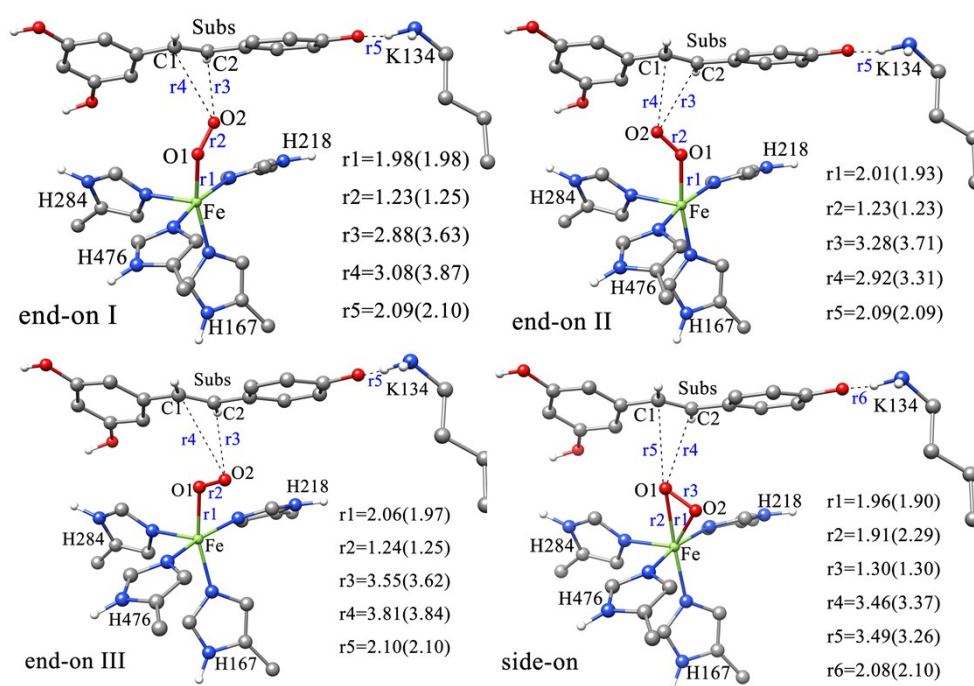

Figure S4 Optimized geometries for different binding modes (one side on mode and three side on

modes) at triplet state and quintet state (in brackets). All distances are shown in angstrom.

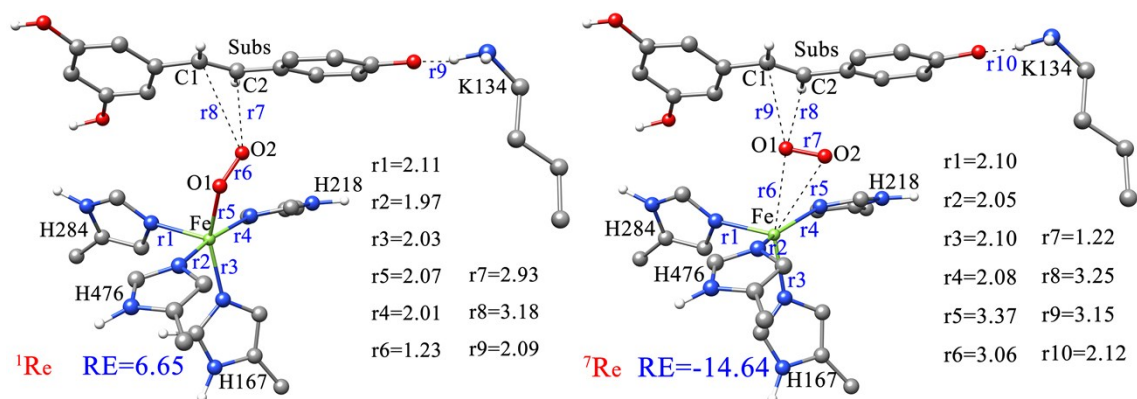

Figure S5 Optimized geometries of the end-on I mode at the open-shell singlet and septet spin states. The relative energies (RE) are given in kcal/mol, and distances are shown in angstrom.

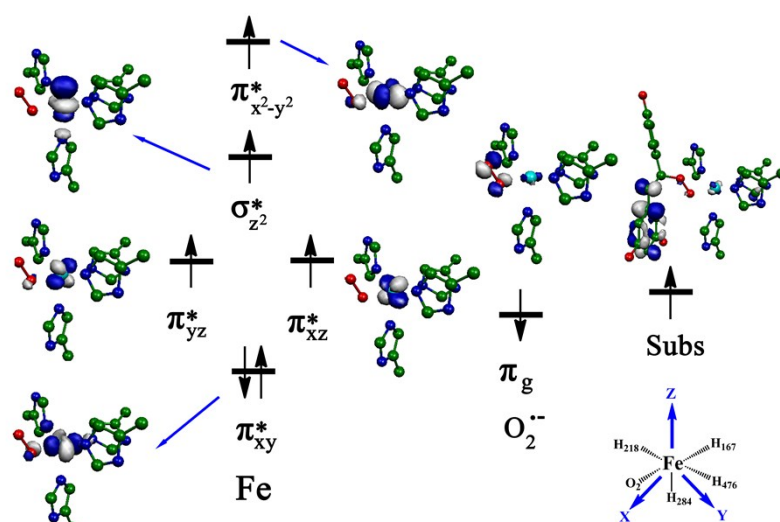

Figure S6 Valence electron orbital diagrams of <sup>5</sup>IM1a.

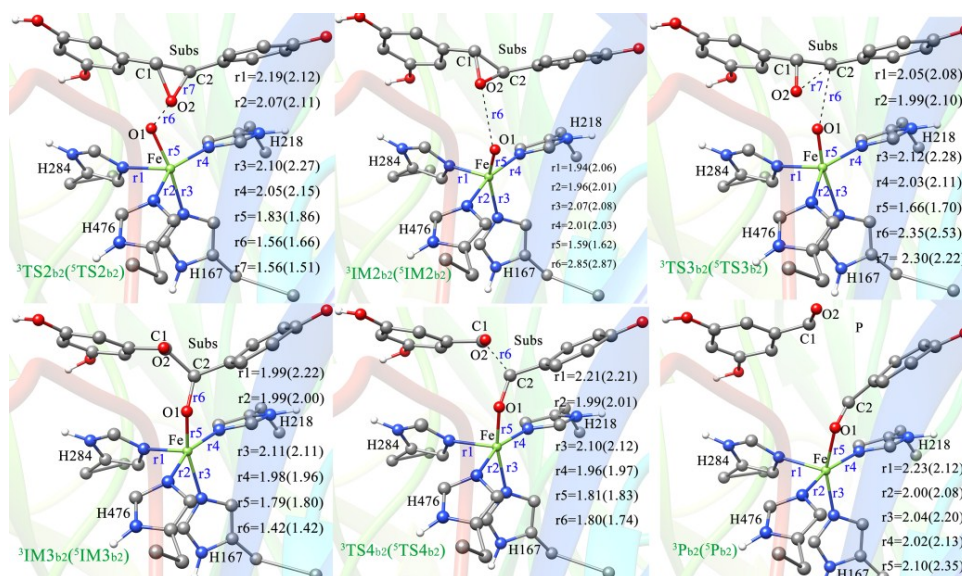



Figure S7 Optimized structures of transition states and intermediates at triplet and quintet (showed in parentheses) spin states in path\_b2. All distances are shown in angstrom.

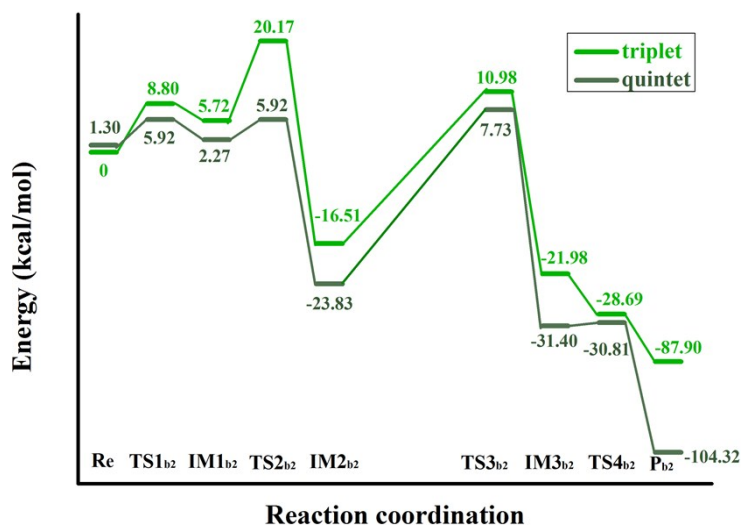

Figure S8 Energy profiles of path-b2 at the triplet and quintet spin states. All energies are given in kcal/mol relative to  ${}^3\text{Re}$ . Note that the optimized transition state  ${}^3\text{TS4b2}$  is higher than  ${}^3\text{IM3b2}$  at the UB3LYP/6-31G (d,p) level, after single point calculation and DFT-D3 correction,  ${}^3\text{TS4b2}$  is slightly lower than  ${}^3\text{IM3b2}$ .

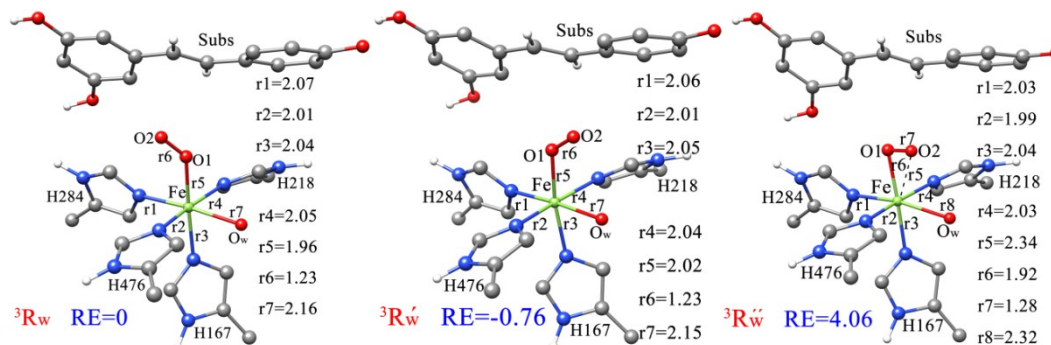

Figure S9 Optimized geometries of Fe-O2 complex at triplet state with a water molecule coordinated with the iron center.  ${}^3R_w$  and  ${}^3R_w'$  represent the two end-on modes, and  ${}^3R_w''$  represents the side-on mode. All distances are shown in angstroms, and relative energies are given in kcal/mol.

Absolute QM/MM single-point energies (E, a.u.) at the B3LYP/6-311++G(2d,2p) level, as well as Cartesian coordinates of QM regions:

${}^5\text{Re}$

E=-2747.071758 (a.u.)

C 2.61300000 14.16700000 -6.18100000

H 1.57300000 14.17400000 -6.52700000

|   |             |             |             |
|---|-------------|-------------|-------------|
| H | 3.25300000  | 14.27400000 | -7.06100000 |
| C | 2.91500000  | 12.90300000 | -5.39700000 |
| C | 1.98000000  | 12.40300000 | -4.48100000 |
| H | 1.01200000  | 12.89200000 | -4.37900000 |
| C | 2.27500000  | 11.32300000 | -3.66200000 |
| H | 1.54800000  | 10.98500000 | -2.93100000 |
| C | 3.52300000  | 10.68200000 | -3.75100000 |
| O | 3.82200000  | 9.62600000  | -2.96900000 |
| H | 2.92500000  | 9.08700000  | -2.72300000 |
| C | 4.16000000  | 12.26300000 | -5.48000000 |
| H | 4.90900000  | 12.65000000 | -6.16900000 |
| C | 4.46400000  | 11.16000000 | -4.67900000 |
| H | 5.43100000  | 10.66600000 | -4.74000000 |
| C | 1.22200000  | 9.59700000  | 3.80700000  |
| H | 0.17100000  | 9.29400000  | 3.84900000  |
| H | 1.41600000  | 10.24800000 | 4.66000000  |
| C | 1.49300000  | 10.32000000 | 2.48100000  |
| H | 1.18500000  | 11.36600000 | 2.61300000  |
| H | 2.56600000  | 10.37600000 | 2.25200000  |
| C | 0.73700000  | 9.75000000  | 1.27800000  |
| H | 1.01800000  | 8.70500000  | 1.09700000  |
| H | -0.34000000 | 9.74900000  | 1.50700000  |
| C | 0.96200000  | 10.59700000 | 0.02300000  |
| H | 0.88300000  | 11.65300000 | 0.31700000  |
| H | 1.98400000  | 10.46900000 | -0.35100000 |
| N | 0.03700000  | 10.34700000 | -1.09900000 |
| H | -0.91400000 | 10.24500000 | -0.72500000 |
| H | 0.30300000  | 9.46200000  | -1.53500000 |
| C | 5.13600000  | -0.93400000 | 3.05800000  |
| H | 5.96000000  | -0.23900000 | 2.88900000  |
| H | 5.55500000  | -1.93600000 | 3.15000000  |
| N | 3.39300000  | -2.05600000 | 1.65500000  |
| H | 3.35300000  | -2.88000000 | 2.26100000  |
| C | 4.20000000  | -0.95800000 | 1.89500000  |
| C | 2.67400000  | -1.84300000 | 0.54400000  |
| H | 1.99900000  | -2.57100000 | 0.12100000  |
| N | 2.97600000  | -0.64300000 | 0.03800000  |
| C | 3.93100000  | -0.08500000 | 0.87700000  |
| H | 4.35600000  | 0.88800000  | 0.70200000  |
| C | 7.29000000  | 2.11200000  | -2.09500000 |
| H | 7.57400000  | 3.01500000  | -2.64600000 |
| H | 7.61600000  | 1.26200000  | -2.70000000 |
| N | 5.04400000  | 3.08100000  | -1.39400000 |
| H | 5.40100000  | 3.96000000  | -0.96200000 |



|    |             |             |             |
|----|-------------|-------------|-------------|
| C  | 5.81100000  | 2.04600000  | -1.90100000 |
| C  | 3.76200000  | 2.67300000  | -1.33600000 |
| H  | 2.95100000  | 3.27200000  | -0.94900000 |
| N  | 3.65700000  | 1.42800000  | -1.79100000 |
| C  | 4.92800000  | 1.02800000  | -2.15300000 |
| H  | 5.12000000  | 0.04900000  | -2.56400000 |
| C  | 3.87900000  | -4.52400000 | -3.97300000 |
| H  | 3.69300000  | -4.94600000 | -4.96500000 |
| H  | 3.50500000  | -5.22400000 | -3.21600000 |
| N  | 2.15000000  | -2.78700000 | -4.60500000 |
| H  | 1.84800000  | -3.28700000 | -5.47000000 |
| C  | 3.17500000  | -3.21600000 | -3.78700000 |
| C  | 1.65500000  | -1.63800000 | -4.09900000 |
| H  | 0.85500000  | -1.07900000 | -4.55900000 |
| N  | 2.30800000  | -1.29900000 | -2.98500000 |
| C  | 3.26000000  | -2.28500000 | -2.78600000 |
| H  | 3.90400000  | -2.29500000 | -1.91900000 |
| C  | -2.33200000 | -0.60600000 | 1.85200000  |
| H  | -2.16000000 | 0.31400000  | 2.41200000  |
| H  | -2.22300000 | -1.44600000 | 2.54200000  |
| N  | -1.23500000 | -1.76700000 | -0.13100000 |
| H  | -1.79000000 | -2.65500000 | -0.10700000 |
| C  | -1.33800000 | -0.69200000 | 0.73300000  |
| C  | -0.25200000 | -1.53500000 | -1.01300000 |
| H  | 0.04300000  | -2.23900000 | -1.77700000 |
| N  | 0.30600000  | -0.35300000 | -0.76000000 |
| C  | -0.36300000 | 0.18700000  | 0.32600000  |
| H  | -0.10800000 | 1.15300000  | 0.73300000  |
| Fe | 2.05900000  | 0.23100000  | -1.50200000 |
| O  | 1.02600000  | 1.58900000  | -2.50300000 |
| O  | 0.65800000  | 2.70800000  | -2.09500000 |
| C  | 0.07100000  | 0.02100000  | -8.25000000 |
| O  | -1.00600000 | -0.20200000 | -9.04500000 |
| H  | -0.91000000 | -1.03000000 | -9.56800000 |
| C  | 2.25000000  | -0.50900000 | -7.35700000 |
| O  | 3.35900000  | -1.29700000 | -7.24900000 |
| H  | 3.18600000  | -2.22600000 | -7.53800000 |
| C  | 1.85800000  | 7.16900000  | -3.17000000 |
| O  | 1.76600000  | 8.34800000  | -2.54900000 |
| C  | 1.14400000  | 1.53800000  | -6.68100000 |
| C  | 1.07800000  | 2.79800000  | -5.94200000 |
| H  | 0.08800000  | 3.25200000  | -5.91800000 |
| C  | 2.10200000  | 3.43900000  | -5.34100000 |
| H  | 3.10600000  | 3.02200000  | -5.41900000 |

|   |             |             |             |
|---|-------------|-------------|-------------|
| C | 2.00000000  | 4.68700000  | -4.59200000 |
| C | 1.16900000  | -0.84300000 | -8.18400000 |
| H | 1.18200000  | -1.74700000 | -8.78200000 |
| C | 2.25100000  | 0.67400000  | -6.61800000 |
| H | 3.10900000  | 0.89400000  | -5.99400000 |
| C | 0.04700000  | 1.18600000  | -7.48000000 |
| H | -0.83100000 | 1.82200000  | -7.53300000 |
| C | 3.16200000  | 5.36900000  | -4.19000000 |
| H | 4.13400000  | 4.94300000  | -4.43300000 |
| C | 3.10400000  | 6.58000000  | -3.50000000 |
| H | 4.02100000  | 7.07800000  | -3.20000000 |
| C | 0.69000000  | 6.46700000  | -3.55300000 |
| H | -0.27500000 | 6.89600000  | -3.29500000 |
| C | 0.76400000  | 5.26700000  | -4.23500000 |
| H | -0.15800000 | 4.76000000  | -4.49500000 |

<sup>5</sup>TS1b

E=-2747.064871 (a.u.)

|   |             |             |             |
|---|-------------|-------------|-------------|
| C | 2.60400000  | 14.17100000 | -6.18400000 |
| H | 1.56200000  | 14.17900000 | -6.52400000 |
| H | 3.23800000  | 14.28000000 | -7.06800000 |
| C | 2.91100000  | 12.90800000 | -5.40500000 |
| C | 1.98100000  | 12.40300000 | -4.48600000 |
| H | 1.01100000  | 12.88500000 | -4.38100000 |
| C | 2.28700000  | 11.32700000 | -3.66500000 |
| H | 1.56600000  | 10.98500000 | -2.93000000 |
| C | 3.54000000  | 10.70200000 | -3.76000000 |
| O | 3.85900000  | 9.64900000  | -2.97200000 |
| H | 2.99200000  | 9.13700000  | -2.70900000 |
| C | 4.16000000  | 12.27600000 | -5.49300000 |
| H | 4.90400000  | 12.66800000 | -6.18500000 |
| C | 4.47600000  | 11.17800000 | -4.69100000 |
| H | 5.44600000  | 10.69100000 | -4.75100000 |
| C | 1.21900000  | 9.60100000  | 3.82200000  |
| H | 0.17000000  | 9.29500000  | 3.86800000  |
| H | 1.41500000  | 10.25000000 | 4.67600000  |
| C | 1.48200000  | 10.33000000 | 2.49800000  |
| H | 1.17000000  | 11.37400000 | 2.63500000  |
| H | 2.55400000  | 10.39100000 | 2.26600000  |
| C | 0.72400000  | 9.76200000  | 1.29500000  |
| H | 1.00900000  | 8.71900000  | 1.11000000  |
| H | -0.35300000 | 9.75600000  | 1.52400000  |
| C | 0.94500000  | 10.61600000 | 0.04400000  |

|   |             |             |             |
|---|-------------|-------------|-------------|
| H | 0.85300000  | 11.67000000 | 0.33900000  |
| H | 1.97100000  | 10.50300000 | -0.32500000 |
| N | 0.02900000  | 10.36200000 | -1.08400000 |
| H | -0.92600000 | 10.27300000 | -0.71700000 |
| H | 0.28700000  | 9.46800000  | -1.50500000 |
| C | 5.11800000  | -0.94300000 | 3.06800000  |
| H | 5.93000000  | -0.23500000 | 2.88900000  |
| H | 5.55800000  | -1.93500000 | 3.16600000  |
| N | 3.37500000  | -2.09500000 | 1.68700000  |
| H | 3.32700000  | -2.90100000 | 2.31500000  |
| C | 4.18000000  | -0.99100000 | 1.90400000  |
| C | 2.68400000  | -1.91000000 | 0.54700000  |
| H | 2.01200000  | -2.64900000 | 0.13700000  |
| N | 2.98900000  | -0.73300000 | 0.00600000  |
| C | 3.92300000  | -0.15400000 | 0.85100000  |
| H | 4.36000000  | 0.81000000  | 0.64400000  |
| C | 7.22200000  | 2.15900000  | -2.10100000 |
| H | 7.52800000  | 3.06600000  | -2.63600000 |
| H | 7.53800000  | 1.31300000  | -2.71800000 |
| N | 4.97400000  | 3.12300000  | -1.36800000 |
| H | 5.33500000  | 3.97800000  | -0.89200000 |
| C | 5.73800000  | 2.11300000  | -1.93100000 |
| C | 3.68100000  | 2.73600000  | -1.38700000 |
| H | 2.87300000  | 3.31400000  | -0.96400000 |
| N | 3.55900000  | 1.53800000  | -1.94800000 |
| C | 4.83900000  | 1.14500000  | -2.29400000 |
| H | 5.02800000  | 0.19300000  | -2.76700000 |
| C | 3.96600000  | -4.67100000 | -3.99100000 |
| H | 3.80500000  | -5.10600000 | -4.98200000 |
| H | 3.60700000  | -5.37700000 | -3.23300000 |
| N | 2.19800000  | -2.99100000 | -4.64800000 |
| H | 1.91100000  | -3.49500000 | -5.51500000 |
| C | 3.22700000  | -3.38500000 | -3.81900000 |
| C | 1.67700000  | -1.84700000 | -4.16400000 |
| H | 0.87100000  | -1.30300000 | -4.62800000 |
| N | 2.31900000  | -1.48000000 | -3.05400000 |
| C | 3.28600000  | -2.44000000 | -2.82800000 |
| H | 3.91800000  | -2.41600000 | -1.95400000 |
| C | -2.40200000 | -0.54500000 | 1.83700000  |
| H | -2.24400000 | 0.38000000  | 2.39400000  |
| H | -2.27700000 | -1.38300000 | 2.52700000  |
| N | -1.29800000 | -1.71000000 | -0.13200000 |
| H | -1.81800000 | -2.61600000 | -0.07700000 |
| C | -1.42300000 | -0.61400000 | 0.70400000  |

|    |             |             |             |
|----|-------------|-------------|-------------|
| C  | -0.36600000 | -1.44900000 | -1.05900000 |
| H  | -0.06600000 | -2.16300000 | -1.81200000 |
| N  | 0.14000000  | -0.22900000 | -0.87300000 |
| C  | -0.51300000 | 0.29900000  | 0.22900000  |
| H  | -0.28200000 | 1.28300000  | 0.60900000  |
| Fe | 1.97900000  | 0.14800000  | -1.75300000 |
| O  | 0.89600000  | 0.90400000  | -3.66600000 |
| O  | 0.79600000  | 2.17200000  | -3.89900000 |
| C  | 0.06800000  | 0.07900000  | -8.15300000 |
| O  | -0.99500000 | -0.10400000 | -8.97300000 |
| H  | -0.90000000 | -0.91700000 | -9.52200000 |
| C  | 2.25100000  | -0.49200000 | -7.27600000 |
| O  | 3.35600000  | -1.28100000 | -7.20900000 |
| H  | 3.18300000  | -2.19700000 | -7.54000000 |
| C  | 1.87200000  | 7.20000000  | -3.17400000 |
| O  | 1.76800000  | 8.35000000  | -2.53900000 |
| C  | 1.12400000  | 1.49800000  | -6.49200000 |
| C  | 1.03500000  | 2.69600000  | -5.64900000 |
| H  | 0.07100000  | 3.19200000  | -5.71800000 |
| C  | 2.15500000  | 3.51000000  | -5.33500000 |
| H  | 3.15300000  | 3.12500000  | -5.53200000 |
| C  | 2.04300000  | 4.74800000  | -4.65000000 |
| C  | 1.17200000  | -0.78100000 | -8.12000000 |
| H  | 1.19400000  | -1.65800000 | -8.76000000 |
| C  | 2.24500000  | 0.65700000  | -6.47800000 |
| H  | 3.09800000  | 0.85500000  | -5.84000000 |
| C  | 0.03000000  | 1.19600000  | -7.31500000 |
| H  | -0.85400000 | 1.82400000  | -7.32800000 |
| C  | 3.20900000  | 5.45300000  | -4.24600000 |
| H  | 4.18200000  | 5.03600000  | -4.49400000 |
| C  | 3.13400000  | 6.63500000  | -3.53100000 |
| H  | 4.04300000  | 7.14000000  | -3.21800000 |
| C  | 0.70600000  | 6.48800000  | -3.57000000 |
| H  | -0.26100000 | 6.90200000  | -3.29700000 |
| C  | 0.78900000  | 5.31300000  | -4.27800000 |
| H  | -0.12900000 | 4.80500000  | -4.54400000 |

<sup>5</sup>IM1b

E=-2747.06964 (a.u.)

|   |            |             |             |
|---|------------|-------------|-------------|
| C | 2.61000000 | 14.18500000 | -6.22100000 |
| H | 1.56300000 | 14.18700000 | -6.54500000 |
| H | 3.22900000 | 14.31700000 | -7.11200000 |
| C | 2.94700000 | 12.91200000 | -5.47100000 |

|   |             |             |             |
|---|-------------|-------------|-------------|
| C | 2.06600000  | 12.41100000 | -4.50300000 |
| H | 1.10900000  | 12.90300000 | -4.33600000 |
| C | 2.40500000  | 11.32200000 | -3.71500000 |
| H | 1.72000000  | 10.97500000 | -2.94900000 |
| C | 3.64100000  | 10.68300000 | -3.89800000 |
| O | 3.99200000  | 9.60600000  | -3.15100000 |
| H | 3.14500000  | 9.15600000  | -2.80200000 |
| C | 4.17800000  | 12.26600000 | -5.64500000 |
| H | 4.87800000  | 12.63900000 | -6.38900000 |
| C | 4.52600000  | 11.15400000 | -4.87700000 |
| H | 5.47700000  | 10.64800000 | -5.01400000 |
| C | 1.27300000  | 9.59800000  | 3.84100000  |
| H | 0.22100000  | 9.30500000  | 3.90000000  |
| H | 1.48100000  | 10.25400000 | 4.68700000  |
| C | 1.52800000  | 10.31600000 | 2.51000000  |
| H | 1.23300000  | 11.36500000 | 2.65000000  |
| H | 2.59800000  | 10.36000000 | 2.26200000  |
| C | 0.74800000  | 9.76100000  | 1.31400000  |
| H | 1.05500000  | 8.73200000  | 1.08800000  |
| H | -0.32200000 | 9.71900000  | 1.57000000  |
| C | 0.91300000  | 10.66200000 | 0.08800000  |
| H | 0.73900000  | 11.69700000 | 0.40900000  |
| H | 1.94900000  | 10.63900000 | -0.26900000 |
| N | 0.03500000  | 10.37800000 | -1.06200000 |
| H | -0.92600000 | 10.26900000 | -0.71800000 |
| H | 0.32300000  | 9.49000000  | -1.47500000 |
| C | 5.10400000  | -0.92000000 | 3.04300000  |
| H | 5.90900000  | -0.20600000 | 2.85900000  |
| H | 5.55700000  | -1.90700000 | 3.14900000  |
| N | 3.34900000  | -2.08700000 | 1.68600000  |
| H | 3.27900000  | -2.87200000 | 2.34000000  |
| C | 4.17400000  | -0.99200000 | 1.87500000  |
| C | 2.68100000  | -1.93000000 | 0.52700000  |
| H | 1.99700000  | -2.66800000 | 0.13500000  |
| N | 3.01900000  | -0.78200000 | -0.05300000 |
| C | 3.95200000  | -0.19400000 | 0.78300000  |
| H | 4.41900000  | 0.74500000  | 0.53700000  |
| C | 7.22600000  | 2.22100000  | -2.11800000 |
| H | 7.53300000  | 3.13700000  | -2.63600000 |
| H | 7.55400000  | 1.38500000  | -2.74300000 |
| N | 4.94600000  | 3.15000000  | -1.42100000 |
| H | 5.26400000  | 4.02100000  | -0.94600000 |
| C | 5.74100000  | 2.15500000  | -1.96700000 |
| C | 3.66400000  | 2.71900000  | -1.44100000 |

|    |             |             |             |
|----|-------------|-------------|-------------|
| H  | 2.84400000  | 3.26700000  | -1.00200000 |
| N  | 3.58000000  | 1.51300000  | -1.98900000 |
| C  | 4.87100000  | 1.15700000  | -2.32500000 |
| H  | 5.09200000  | 0.20600000  | -2.78700000 |
| C  | 4.03600000  | -4.75400000 | -4.00600000 |
| H  | 3.89300000  | -5.18500000 | -5.00200000 |
| H  | 3.69100000  | -5.47700000 | -3.25600000 |
| N  | 2.21800000  | -3.11700000 | -4.64300000 |
| H  | 1.94800000  | -3.60500000 | -5.52500000 |
| C  | 3.26400000  | -3.48900000 | -3.82400000 |
| C  | 1.67500000  | -1.98800000 | -4.14800000 |
| H  | 0.85600000  | -1.45500000 | -4.60400000 |
| N  | 2.31400000  | -1.61400000 | -3.04000000 |
| C  | 3.30400000  | -2.54900000 | -2.82700000 |
| H  | 3.94300000  | -2.51300000 | -1.95800000 |
| C  | -2.38700000 | -0.55200000 | 1.86400000  |
| H  | -2.22900000 | 0.37600000  | 2.41500000  |
| H  | -2.26900000 | -1.38500000 | 2.56300000  |
| N  | -1.28800000 | -1.73500000 | -0.09500000 |
| H  | -1.81700000 | -2.63500000 | -0.04200000 |
| C  | -1.40200000 | -0.63600000 | 0.73700000  |
| C  | -0.35400000 | -1.48300000 | -1.02400000 |
| H  | -0.05900000 | -2.20200000 | -1.77500000 |
| N  | 0.16500000  | -0.27000000 | -0.84100000 |
| C  | -0.48200000 | 0.26600000  | 0.25800000  |
| H  | -0.24400000 | 1.25000000  | 0.63500000  |
| Fe | 1.97800000  | 0.09300000  | -1.82600000 |
| O  | 1.03200000  | 0.76100000  | -3.62100000 |
| O  | 0.83600000  | 2.09700000  | -3.81000000 |
| C  | 0.09800000  | 0.18700000  | -8.06300000 |
| O  | -0.95200000 | 0.08000000  | -8.91500000 |
| H  | -0.86600000 | -0.71400000 | -9.49400000 |
| C  | 2.25200000  | -0.47500000 | -7.18600000 |
| O  | 3.34800000  | -1.27900000 | -7.15600000 |
| H  | 3.16800000  | -2.17200000 | -7.54000000 |
| C  | 1.92300000  | 7.22000000  | -3.10900000 |
| O  | 1.84200000  | 8.39300000  | -2.54000000 |
| C  | 1.11600000  | 1.44200000  | -6.25900000 |
| C  | 0.98900000  | 2.54900000  | -5.26100000 |
| H  | 0.07800000  | 3.11400000  | -5.46100000 |
| C  | 2.15600000  | 3.39900000  | -4.99000000 |
| H  | 3.14000000  | 2.94800000  | -5.09200000 |
| C  | 2.06100000  | 4.68000000  | -4.42700000 |
| C  | 1.19100000  | -0.68500000 | -8.07500000 |

|   |             |             |             |
|---|-------------|-------------|-------------|
| H | 1.22600000  | -1.50800000 | -8.78300000 |
| C | 2.23400000  | 0.60400000  | -6.29500000 |
| H | 3.06300000  | 0.72300000  | -5.60700000 |
| C | 0.05100000  | 1.23600000  | -7.13900000 |
| H | -0.83500000 | 1.86100000  | -7.10900000 |
| C | 3.24100000  | 5.37100000  | -4.01900000 |
| H | 4.20600000  | 4.90300000  | -4.19900000 |
| C | 3.18300000  | 6.59400000  | -3.38900000 |
| H | 4.09600000  | 7.08300000  | -3.06500000 |
| C | 0.74300000  | 6.52600000  | -3.51400000 |
| H | -0.21600000 | 6.98800000  | -3.29700000 |
| C | 0.80800000  | 5.31300000  | -4.15000000 |
| H | -0.11600000 | 4.81800000  | -4.42000000 |

<sup>5</sup>TS2<sub>b1</sub>

E=-2747.068358 (a.u.)

|   |             |             |             |
|---|-------------|-------------|-------------|
| C | 2.61700000  | 14.18100000 | -6.21600000 |
| H | 1.57100000  | 14.18100000 | -6.54200000 |
| H | 3.23800000  | 14.31000000 | -7.10700000 |
| C | 2.95300000  | 12.90900000 | -5.46300000 |
| C | 2.06700000  | 12.41000000 | -4.49800000 |
| H | 1.11200000  | 12.90600000 | -4.33300000 |
| C | 2.39800000  | 11.31800000 | -3.71100000 |
| H | 1.70900000  | 10.97000000 | -2.94900000 |
| C | 3.63000000  | 10.66700000 | -3.89200000 |
| O | 3.96400000  | 9.58400000  | -3.15100000 |
| H | 3.09600000  | 9.12000000  | -2.81900000 |
| C | 4.18200000  | 12.25700000 | -5.63200000 |
| H | 4.88600000  | 12.62800000 | -6.37400000 |
| C | 4.52000000  | 11.14100000 | -4.86600000 |
| H | 5.46800000  | 10.62800000 | -5.00500000 |
| C | 1.26800000  | 9.59800000  | 3.83700000  |
| H | 0.21600000  | 9.30200000  | 3.89200000  |
| H | 1.47200000  | 10.25500000 | 4.68300000  |
| C | 1.52600000  | 10.31500000 | 2.50500000  |
| H | 1.22700000  | 11.36400000 | 2.64300000  |
| H | 2.59600000  | 10.36200000 | 2.26200000  |
| C | 0.75200000  | 9.75800000  | 1.30500000  |
| H | 1.06600000  | 8.73200000  | 1.07800000  |
| H | -0.31800000 | 9.71100000  | 1.55700000  |
| C | 0.92000000  | 10.66200000 | 0.08100000  |
| H | 0.73800000  | 11.69600000 | 0.40500000  |
| H | 1.95800000  | 10.64300000 | -0.26800000 |



|   |             |             |             |
|---|-------------|-------------|-------------|
| N | 0.05100000  | 10.37600000 | -1.07500000 |
| H | -0.90900000 | 10.24600000 | -0.73700000 |
| H | 0.36200000  | 9.49900000  | -1.49900000 |
| C | 5.10600000  | -0.93500000 | 3.05800000  |
| H | 5.90500000  | -0.21700000 | 2.86100000  |
| H | 5.56500000  | -1.91700000 | 3.16900000  |
| N | 3.34200000  | -2.12000000 | 1.72300000  |
| H | 3.27600000  | -2.90000000 | 2.38400000  |
| C | 4.16900000  | -1.02300000 | 1.89700000  |
| C | 2.66200000  | -1.97300000 | 0.57100000  |
| H | 1.97500000  | -2.71300000 | 0.18900000  |
| N | 2.99800000  | -0.82700000 | -0.01900000 |
| C | 3.94000000  | -0.23200000 | 0.80500000  |
| H | 4.40400000  | 0.70500000  | 0.55200000  |
| C | 7.25500000  | 2.22600000  | -2.10100000 |
| H | 7.55000000  | 3.14800000  | -2.61400000 |
| H | 7.58700000  | 1.39600000  | -2.73100000 |
| N | 4.97100000  | 3.13800000  | -1.40400000 |
| H | 5.28200000  | 4.02400000  | -0.95000000 |
| C | 5.77400000  | 2.14300000  | -1.93500000 |
| C | 3.70000000  | 2.68400000  | -1.38100000 |
| H | 2.87400000  | 3.23200000  | -0.95100000 |
| N | 3.63300000  | 1.45800000  | -1.88400000 |
| C | 4.92100000  | 1.11500000  | -2.23900000 |
| H | 5.15300000  | 0.15600000  | -2.68000000 |
| C | 4.03100000  | -4.73800000 | -3.99900000 |
| H | 3.87900000  | -5.16500000 | -4.99500000 |
| H | 3.68200000  | -5.45700000 | -3.24900000 |
| N | 2.25200000  | -3.05900000 | -4.64400000 |
| H | 1.97100000  | -3.54500000 | -5.52600000 |
| C | 3.27600000  | -3.46300000 | -3.81300000 |
| C | 1.72800000  | -1.92300000 | -4.14800000 |
| H | 0.92100000  | -1.37900000 | -4.61200000 |
| N | 2.36100000  | -1.57100000 | -3.02800000 |
| C | 3.32800000  | -2.53300000 | -2.80900000 |
| H | 3.95600000  | -2.52000000 | -1.93100000 |
| C | -2.36100000 | -0.53600000 | 1.84800000  |
| H | -2.20400000 | 0.39000000  | 2.40200000  |
| H | -2.23100000 | -1.37300000 | 2.54000000  |
| N | -1.27500000 | -1.70300000 | -0.12800000 |
| H | -1.80700000 | -2.60200000 | -0.07600000 |
| C | -1.38600000 | -0.60800000 | 0.71200000  |
| C | -0.34400000 | -1.44900000 | -1.05700000 |
| H | -0.05100000 | -2.16800000 | -1.81000000 |

|    |             |             |             |
|----|-------------|-------------|-------------|
| N  | 0.17800000  | -0.23600000 | -0.86900000 |
| C  | -0.46400000 | 0.29500000  | 0.23800000  |
| H  | -0.22000000 | 1.27500000  | 0.62100000  |
| Fe | 2.03000000  | 0.06900000  | -1.76000000 |
| O  | 1.38600000  | 1.00600000  | -3.50600000 |
| O  | 0.46600000  | 1.84900000  | -3.95700000 |
| C  | 0.06700000  | 0.14800000  | -8.13700000 |
| O  | -0.97900000 | 0.02500000  | -8.99000000 |
| H  | -0.88800000 | -0.77000000 | -9.56500000 |
| C  | 2.23200000  | -0.48000000 | -7.26500000 |
| O  | 3.34400000  | -1.26500000 | -7.23900000 |
| H  | 3.17000000  | -2.17100000 | -7.59500000 |
| C  | 1.89100000  | 7.19900000  | -3.10400000 |
| O  | 1.83300000  | 8.39800000  | -2.55100000 |
| C  | 1.06800000  | 1.42300000  | -6.33500000 |
| C  | 0.91900000  | 2.50900000  | -5.31200000 |
| H  | 0.00800000  | 3.08000000  | -5.50200000 |
| C  | 2.07500000  | 3.37400000  | -5.04100000 |
| H  | 3.06900000  | 2.96200000  | -5.19000000 |
| C  | 1.97900000  | 4.63200000  | -4.40400000 |
| C  | 1.17100000  | -0.71000000 | -8.14900000 |
| H  | 1.21700000  | -1.53000000 | -8.86000000 |
| C  | 2.20000000  | 0.60000000  | -6.37600000 |
| H  | 3.03900000  | 0.74500000  | -5.70800000 |
| C  | 0.00200000  | 1.19500000  | -7.21100000 |
| H  | -0.89100000 | 1.81000000  | -7.18500000 |
| C  | 3.16800000  | 5.32600000  | -4.02700000 |
| H  | 4.12700000  | 4.85600000  | -4.23000000 |
| C  | 3.13100000  | 6.55600000  | -3.39600000 |
| H  | 4.05700000  | 7.04000000  | -3.10100000 |
| C  | 0.70400000  | 6.50500000  | -3.47100000 |
| H  | -0.24900000 | 6.97900000  | -3.24700000 |
| C  | 0.74400000  | 5.27600000  | -4.09000000 |
| H  | -0.19400000 | 4.79100000  | -4.33400000 |

<sup>5</sup>IM2<sub>bl</sub>

E=-2747.070621 (a.u.)

|   |            |             |             |
|---|------------|-------------|-------------|
| C | 2.60200000 | 14.17500000 | -6.20100000 |
| H | 1.55600000 | 14.18300000 | -6.53100000 |
| H | 3.22700000 | 14.29500000 | -7.09000000 |
| C | 2.92200000 | 12.90300000 | -5.44000000 |
| C | 2.01800000 | 12.40000000 | -4.49400000 |
| H | 1.06100000 | 12.89600000 | -4.34600000 |

|   |             |             |             |
|---|-------------|-------------|-------------|
| C | 2.33400000  | 11.30400000 | -3.70600000 |
| H | 1.63100000  | 10.95600000 | -2.95600000 |
| C | 3.57000000  | 10.65500000 | -3.86200000 |
| O | 3.89600000  | 9.57500000  | -3.11400000 |
| H | 3.02400000  | 9.07400000  | -2.83300000 |
| C | 4.15400000  | 12.25100000 | -5.58800000 |
| H | 4.87200000  | 12.62500000 | -6.31500000 |
| C | 4.47800000  | 11.13400000 | -4.81800000 |
| H | 5.43000000  | 10.62400000 | -4.93800000 |
| C | 1.27500000  | 9.60200000  | 3.83800000  |
| H | 0.22200000  | 9.31100000  | 3.89200000  |
| H | 1.48000000  | 10.26000000 | 4.68500000  |
| C | 1.53800000  | 10.31700000 | 2.50600000  |
| H | 1.23600000  | 11.36600000 | 2.63900000  |
| H | 2.60900000  | 10.36500000 | 2.26700000  |
| C | 0.77000000  | 9.75100000  | 1.30700000  |
| H | 1.08100000  | 8.72100000  | 1.09500000  |
| H | -0.30200000 | 9.71100000  | 1.55500000  |
| C | 0.94500000  | 10.63800000 | 0.07200000  |
| H | 0.78600000  | 11.67900000 | 0.38400000  |
| H | 1.97900000  | 10.59600000 | -0.28800000 |
| N | 0.05900000  | 10.35200000 | -1.07200000 |
| H | -0.89800000 | 10.23200000 | -0.72000000 |
| H | 0.35300000  | 9.47000000  | -1.49600000 |
| C | 5.10100000  | -0.96400000 | 3.06900000  |
| H | 5.91000000  | -0.25600000 | 2.87500000  |
| H | 5.54700000  | -1.95200000 | 3.18000000  |
| N | 3.32600000  | -2.11800000 | 1.71700000  |
| H | 3.25200000  | -2.90500000 | 2.36900000  |
| C | 4.16700000  | -1.03500000 | 1.90500000  |
| C | 2.65700000  | -1.95300000 | 0.56100000  |
| H | 1.96100000  | -2.68000000 | 0.16900000  |
| N | 3.01200000  | -0.80800000 | -0.01900000 |
| C | 3.95800000  | -0.23300000 | 0.81600000  |
| H | 4.43800000  | 0.69900000  | 0.57400000  |
| C | 7.32000000  | 2.23100000  | -2.06300000 |
| H | 7.61800000  | 3.15800000  | -2.56600000 |
| H | 7.65600000  | 1.40700000  | -2.69700000 |
| N | 5.03400000  | 3.15900000  | -1.40300000 |
| H | 5.34400000  | 4.04800000  | -0.95300000 |
| C | 5.83900000  | 2.15000000  | -1.90500000 |
| C | 3.76400000  | 2.70800000  | -1.37000000 |
| H | 2.93700000  | 3.26900000  | -0.96100000 |
| N | 3.69800000  | 1.46800000  | -1.83900000 |

|    |             |             |             |
|----|-------------|-------------|-------------|
| C  | 4.98700000  | 1.11400000  | -2.18500000 |
| H  | 5.21800000  | 0.14500000  | -2.59900000 |
| C  | 3.97500000  | -4.67700000 | -4.00100000 |
| H  | 3.81700000  | -5.10900000 | -4.99400000 |
| H  | 3.61700000  | -5.38600000 | -3.24600000 |
| N  | 2.19800000  | -2.99600000 | -4.64900000 |
| H  | 1.91500000  | -3.49100000 | -5.52400000 |
| C  | 3.23200000  | -3.39300000 | -3.82500000 |
| C  | 1.67900000  | -1.85400000 | -4.15800000 |
| H  | 0.86400000  | -1.31900000 | -4.61900000 |
| N  | 2.32400000  | -1.49200000 | -3.04800000 |
| C  | 3.29200000  | -2.45300000 | -2.83000000 |
| H  | 3.92700000  | -2.43300000 | -1.95700000 |
| C  | -2.32000000 | -0.52000000 | 1.84200000  |
| H  | -2.16200000 | 0.40500000  | 2.39800000  |
| H  | -2.17600000 | -1.36000000 | 2.52700000  |
| N  | -1.25600000 | -1.66300000 | -0.16100000 |
| H  | -1.79000000 | -2.56200000 | -0.11200000 |
| C  | -1.36000000 | -0.57700000 | 0.69200000  |
| C  | -0.33200000 | -1.40100000 | -1.09400000 |
| H  | -0.04400000 | -2.11300000 | -1.85400000 |
| N  | 0.19100000  | -0.18900000 | -0.90000000 |
| C  | -0.44500000 | 0.33200000  | 0.21800000  |
| H  | -0.19800000 | 1.30900000  | 0.60800000  |
| Fe | 2.05800000  | 0.15000000  | -1.74600000 |
| O  | 1.51700000  | 1.28500000  | -3.42700000 |
| O  | 0.42100000  | 1.72500000  | -4.03200000 |
| C  | 0.04500000  | 0.07700000  | -8.22200000 |
| O  | -0.98500000 | -0.06100000 | -9.09100000 |
| H  | -0.88500000 | -0.86400000 | -9.65400000 |
| C  | 2.19700000  | -0.52300000 | -7.29800000 |
| O  | 3.31700000  | -1.29400000 | -7.23900000 |
| H  | 3.16200000  | -2.20500000 | -7.59300000 |
| C  | 1.83300000  | 7.14300000  | -3.18700000 |
| O  | 1.78200000  | 8.33200000  | -2.61000000 |
| C  | 0.98900000  | 1.36700000  | -6.40300000 |
| C  | 0.82200000  | 2.44600000  | -5.37300000 |
| H  | -0.11300000 | 2.98700000  | -5.54000000 |
| C  | 1.97500000  | 3.33400000  | -5.15800000 |
| H  | 2.95500000  | 2.96400000  | -5.44300000 |
| C  | 1.89800000  | 4.59000000  | -4.51800000 |
| C  | 1.16100000  | -0.76700000 | -8.20800000 |
| H  | 1.23300000  | -1.58600000 | -8.91600000 |
| C  | 2.13000000  | 0.55600000  | -6.41200000 |

|   |             |            |             |
|---|-------------|------------|-------------|
| H | 2.94300000  | 0.71000000 | -5.71400000 |
| C | -0.05100000 | 1.12800000 | -7.30200000 |
| H | -0.95400000 | 1.73100000 | -7.29600000 |
| C | 3.08900000  | 5.32400000 | -4.24100000 |
| H | 4.04300000  | 4.89200000 | -4.53400000 |
| C | 3.06500000  | 6.54500000 | -3.59100000 |
| H | 3.99400000  | 7.06100000 | -3.36900000 |
| C | 0.64300000  | 6.41600000 | -3.46700000 |
| H | -0.30300000 | 6.86000000 | -3.17000000 |
| C | 0.67300000  | 5.19000000 | -4.09500000 |
| H | -0.26400000 | 4.67500000 | -4.27200000 |

<sup>5</sup>TS3<sub>b1</sub>

E=-2747.068633 (a.u.)

|   |             |             |             |
|---|-------------|-------------|-------------|
| C | 2.59600000  | 14.17500000 | -6.19600000 |
| H | 1.55000000  | 14.18100000 | -6.52100000 |
| H | 3.21800000  | 14.29500000 | -7.08800000 |
| C | 2.92300000  | 12.90100000 | -5.44000000 |
| C | 2.02700000  | 12.39100000 | -4.49200000 |
| H | 1.07000000  | 12.88500000 | -4.33300000 |
| C | 2.34800000  | 11.28600000 | -3.71600000 |
| H | 1.65000000  | 10.93300000 | -2.96400000 |
| C | 3.58200000  | 10.64200000 | -3.89100000 |
| O | 3.91700000  | 9.54600000  | -3.15900000 |
| H | 3.06400000  | 9.06500000  | -2.86900000 |
| C | 4.15600000  | 12.25300000 | -5.60100000 |
| H | 4.86900000  | 12.63400000 | -6.32800000 |
| C | 4.48600000  | 11.12900000 | -4.84400000 |
| H | 5.43800000  | 10.62100000 | -4.97300000 |
| C | 1.27500000  | 9.60000000  | 3.83900000  |
| H | 0.22200000  | 9.30700000  | 3.89200000  |
| H | 1.47900000  | 10.26000000 | 4.68300000  |
| C | 1.53900000  | 10.31200000 | 2.50500000  |
| H | 1.23800000  | 11.36000000 | 2.63500000  |
| H | 2.61000000  | 10.35800000 | 2.26600000  |
| C | 0.77000000  | 9.74400000  | 1.30800000  |
| H | 1.07900000  | 8.71200000  | 1.09800000  |
| H | -0.30200000 | 9.70500000  | 1.55600000  |
| C | 0.94400000  | 10.62900000 | 0.07100000  |
| H | 0.78400000  | 11.66900000 | 0.38200000  |
| H | 1.97700000  | 10.58800000 | -0.29100000 |
| N | 0.05400000  | 10.34500000 | -1.07100000 |
| H | -0.90400000 | 10.24100000 | -0.71800000 |

|   |             |             |             |
|---|-------------|-------------|-------------|
| H | 0.32900000  | 9.45300000  | -1.48500000 |
| C | 5.08300000  | -0.96000000 | 3.04700000  |
| H | 5.90000000  | -0.26100000 | 2.85800000  |
| H | 5.51800000  | -1.95300000 | 3.15500000  |
| N | 3.30500000  | -2.09900000 | 1.69000000  |
| H | 3.22900000  | -2.88700000 | 2.33800000  |
| C | 4.15000000  | -1.01900000 | 1.88200000  |
| C | 2.64000000  | -1.92700000 | 0.53100000  |
| H | 1.94400000  | -2.65100000 | 0.13400000  |
| N | 3.00000000  | -0.78300000 | -0.04700000 |
| C | 3.94500000  | -0.21500000 | 0.79300000  |
| H | 4.43100000  | 0.71500000  | 0.55300000  |
| C | 7.35900000  | 2.24000000  | -2.06100000 |
| H | 7.67100000  | 3.16500000  | -2.56000000 |
| H | 7.69600000  | 1.41400000  | -2.69200000 |
| N | 5.07500000  | 3.17500000  | -1.41000000 |
| H | 5.38100000  | 4.06000000  | -0.95100000 |
| C | 5.87800000  | 2.16700000  | -1.91400000 |
| C | 3.80300000  | 2.72400000  | -1.38500000 |
| H | 2.97600000  | 3.28200000  | -0.97200000 |
| N | 3.73700000  | 1.48900000  | -1.86100000 |
| C | 5.02300000  | 1.13500000  | -2.20400000 |
| H | 5.25400000  | 0.16700000  | -2.62100000 |
| C | 3.97000000  | -4.67200000 | -4.00000000 |
| H | 3.81200000  | -5.10500000 | -4.99200000 |
| H | 3.61300000  | -5.38000000 | -3.24400000 |
| N | 2.19600000  | -2.98700000 | -4.65000000 |
| H | 1.91100000  | -3.48300000 | -5.52300000 |
| C | 3.22800000  | -3.38600000 | -3.82600000 |
| C | 1.68000000  | -1.84300000 | -4.15800000 |
| H | 0.87000000  | -1.29900000 | -4.61700000 |
| N | 2.32400000  | -1.48400000 | -3.04900000 |
| C | 3.29000000  | -2.44600000 | -2.83100000 |
| H | 3.92500000  | -2.42700000 | -1.95800000 |
| C | -2.30600000 | -0.51900000 | 1.84300000  |
| H | -2.14600000 | 0.40300000  | 2.40200000  |
| H | -2.16000000 | -1.36200000 | 2.52300000  |
| N | -1.24800000 | -1.64900000 | -0.17200000 |
| H | -1.77900000 | -2.54900000 | -0.12300000 |
| C | -1.35200000 | -0.56800000 | 0.68600000  |
| C | -0.33500000 | -1.37300000 | -1.11400000 |
| H | -0.04800000 | -2.07900000 | -1.88000000 |
| N | 0.18000000  | -0.15900000 | -0.91700000 |
| C | -0.45000000 | 0.35100000  | 0.20700000  |

|    |             |             |             |
|----|-------------|-------------|-------------|
| H  | -0.21100000 | 1.32900000  | 0.59700000  |
| Fe | 2.04100000  | 0.20800000  | -1.79900000 |
| O  | 1.59300000  | 1.36100000  | -3.43300000 |
| O  | 0.35500000  | 1.65600000  | -4.03400000 |
| C  | 0.05300000  | 0.10900000  | -8.23100000 |
| O  | -0.97500000 | -0.01800000 | -9.10600000 |
| H  | -0.88000000 | -0.82200000 | -9.66700000 |
| C  | 2.19800000  | -0.51100000 | -7.30600000 |
| O  | 3.32100000  | -1.28000000 | -7.26000000 |
| H  | 3.16000000  | -2.19300000 | -7.60300000 |
| C  | 1.80200000  | 7.10200000  | -3.19600000 |
| O  | 1.75600000  | 8.29100000  | -2.65400000 |
| C  | 0.97900000  | 1.35100000  | -6.36900000 |
| C  | 0.74800000  | 2.35000000  | -5.25500000 |
| H  | -0.12900000 | 2.95700000  | -5.50700000 |
| C  | 1.94500000  | 3.20700000  | -4.92600000 |
| H  | 2.92400000  | 2.81700000  | -5.18100000 |
| C  | 1.86700000  | 4.50500000  | -4.41800000 |
| C  | 1.16800000  | -0.73600000 | -8.22800000 |
| H  | 1.24500000  | -1.54100000 | -8.95200000 |
| C  | 2.12000000  | 0.54300000  | -6.39000000 |
| H  | 2.91400000  | 0.66300000  | -5.66400000 |
| C  | -0.04600000 | 1.14300000  | -7.29400000 |
| H  | -0.95400000 | 1.73900000  | -7.27400000 |
| C  | 3.06900000  | 5.22700000  | -4.12700000 |
| H  | 4.02100000  | 4.75800000  | -4.36200000 |
| C  | 3.04500000  | 6.46900000  | -3.53400000 |
| H  | 3.97300000  | 6.97600000  | -3.28700000 |
| C  | 0.60100000  | 6.39500000  | -3.51200000 |
| H  | -0.34300000 | 6.87600000  | -3.27200000 |
| C  | 0.63100000  | 5.15000000  | -4.08800000 |
| H  | -0.30400000 | 4.64500000  | -4.29800000 |

<sup>5</sup>IM3<sub>bl</sub>

E=-2747.109243 (a.u.)

|   |            |             |             |
|---|------------|-------------|-------------|
| C | 2.61500000 | 14.17300000 | -6.20500000 |
| H | 1.56500000 | 14.16700000 | -6.52100000 |
| H | 3.22400000 | 14.31500000 | -7.10300000 |
| C | 2.97000000 | 12.89000000 | -5.47800000 |
| C | 2.09600000 | 12.34700000 | -4.52600000 |
| H | 1.14400000 | 12.83600000 | -4.32500000 |
| C | 2.42700000 | 11.20700000 | -3.80600000 |
| H | 1.74300000 | 10.82500000 | -3.05600000 |



|   |             |             |             |
|---|-------------|-------------|-------------|
| C | 3.64900000  | 10.55400000 | -4.04000000 |
| O | 3.98300000  | 9.41700000  | -3.38100000 |
| H | 3.11400000  | 8.92100000  | -3.07300000 |
| C | 4.19600000  | 12.24400000 | -5.68800000 |
| H | 4.89500000  | 12.64800000 | -6.41800000 |
| C | 4.53600000  | 11.08700000 | -4.98700000 |
| H | 5.48000000  | 10.57800000 | -5.16400000 |
| C | 1.26400000  | 9.60400000  | 3.82000000  |
| H | 0.21200000  | 9.30600000  | 3.86400000  |
| H | 1.45700000  | 10.26900000 | 4.66300000  |
| C | 1.53600000  | 10.31100000 | 2.48500000  |
| H | 1.20100000  | 11.35100000 | 2.59900000  |
| H | 2.61100000  | 10.38700000 | 2.27200000  |
| C | 0.81300000  | 9.71000000  | 1.27500000  |
| H | 1.16700000  | 8.69100000  | 1.07500000  |
| H | -0.26000000 | 9.62900000  | 1.50300000  |
| C | 0.97900000  | 10.59600000 | 0.03800000  |
| H | 0.77600000  | 11.63100000 | 0.34300000  |
| H | 2.02100000  | 10.58900000 | -0.30200000 |
| N | 0.12300000  | 10.27600000 | -1.12100000 |
| H | -0.83500000 | 10.13200000 | -0.78300000 |
| H | 0.44300000  | 9.39900000  | -1.53700000 |
| C | 5.13600000  | -0.93600000 | 3.08100000  |
| H | 5.94700000  | -0.22800000 | 2.89900000  |
| H | 5.57900000  | -1.92600000 | 3.18800000  |
| N | 3.36400000  | -2.07700000 | 1.71800000  |
| H | 3.28300000  | -2.86600000 | 2.36600000  |
| C | 4.20900000  | -0.99800000 | 1.91100000  |
| C | 2.69900000  | -1.90500000 | 0.56100000  |
| H | 2.00200000  | -2.62800000 | 0.16300000  |
| N | 3.05900000  | -0.75900000 | -0.01300000 |
| C | 4.00500000  | -0.19200000 | 0.82500000  |
| H | 4.49000000  | 0.74000000  | 0.58600000  |
| C | 7.32800000  | 2.23600000  | -2.07900000 |
| H | 7.64100000  | 3.15400000  | -2.59000000 |
| H | 7.65200000  | 1.40200000  | -2.70600000 |
| N | 5.07100000  | 3.17600000  | -1.35000000 |
| H | 5.40000000  | 4.04800000  | -0.87800000 |
| C | 5.84600000  | 2.18100000  | -1.92100000 |
| C | 3.79000000  | 2.76200000  | -1.33700000 |
| H | 2.98300000  | 3.31600000  | -0.88300000 |
| N | 3.68400000  | 1.55900000  | -1.89400000 |
| C | 4.96300000  | 1.19100000  | -2.26600000 |
| H | 5.16400000  | 0.24300000  | -2.74100000 |

|    |             |             |             |
|----|-------------|-------------|-------------|
| C  | 3.89800000  | -4.55500000 | -4.01000000 |
| H  | 3.72900000  | -4.99000000 | -5.00000000 |
| H  | 3.52100000  | -5.24900000 | -3.25000000 |
| N  | 2.11500000  | -2.87700000 | -4.63800000 |
| H  | 1.81700000  | -3.38600000 | -5.50000000 |
| C  | 3.18200000  | -3.25100000 | -3.84700000 |
| C  | 1.60700000  | -1.72600000 | -4.15100000 |
| H  | 0.76700000  | -1.20400000 | -4.58000000 |
| N  | 2.29500000  | -1.33200000 | -3.07900000 |
| C  | 3.27800000  | -2.28600000 | -2.88000000 |
| H  | 3.94100000  | -2.24700000 | -2.02800000 |
| C  | -2.28300000 | -0.52000000 | 1.89700000  |
| H  | -2.12300000 | 0.39900000  | 2.46200000  |
| H  | -2.12900000 | -1.36800000 | 2.57000000  |
| N  | -1.23700000 | -1.62900000 | -0.13700000 |
| H  | -1.77400000 | -2.52700000 | -0.09900000 |
| C  | -1.33600000 | -0.55700000 | 0.73400000  |
| C  | -0.32500000 | -1.34800000 | -1.07600000 |
| H  | -0.04500000 | -2.04500000 | -1.85200000 |
| N  | 0.19500000  | -0.13600000 | -0.86900000 |
| C  | -0.43300000 | 0.36500000  | 0.26300000  |
| H  | -0.19100000 | 1.33900000  | 0.66300000  |
| Fe | 2.06200000  | 0.24500000  | -1.67700000 |
| O  | 1.10000000  | 1.96400000  | -3.14500000 |
| O  | 0.10400000  | 1.36400000  | -4.07000000 |
| C  | 0.05400000  | 0.09500000  | -8.27200000 |
| O  | -0.96600000 | -0.02600000 | -9.15600000 |
| H  | -0.85200000 | -0.80700000 | -9.74600000 |
| C  | 2.20700000  | -0.50300000 | -7.34800000 |
| O  | 3.34400000  | -1.25100000 | -7.31700000 |
| H  | 3.18100000  | -2.17500000 | -7.63100000 |
| C  | 1.84500000  | 6.95800000  | -3.19700000 |
| O  | 1.86300000  | 8.22200000  | -2.79600000 |
| C  | 0.93100000  | 1.28900000  | -6.35600000 |
| C  | 0.61500000  | 2.17500000  | -5.18700000 |
| H  | -0.13700000 | 2.92000000  | -5.46600000 |
| C  | 1.71000000  | 2.74500000  | -4.27100000 |
| H  | 2.71000000  | 2.35400000  | -4.46700000 |
| C  | 1.75600000  | 4.21000000  | -3.98800000 |
| C  | 1.19000000  | -0.72000000 | -8.28600000 |
| H  | 1.29600000  | -1.49800000 | -9.03500000 |
| C  | 2.09400000  | 0.51500000  | -6.39700000 |
| H  | 2.88800000  | 0.62400000  | -5.66900000 |
| C  | -0.07800000 | 1.09400000  | -7.30000000 |

|   |            |           |            |
|---|------------|-----------|------------|
| H | -1.0000000 | 1.6660000 | -7.2660000 |
| C | 2.9790000  | 4.8790000 | -3.8300000 |
| H | 3.9080000  | 4.3360000 | -3.9900000 |
| C | 3.0330000  | 6.2220000 | -3.4550000 |
| H | 3.9950000  | 6.7040000 | -3.3060000 |
| C | 0.6140000  | 6.2860000 | -3.4170000 |
| H | -0.3070000 | 6.8400000 | -3.2580000 |
| C | 0.5780000  | 4.9540000 | -3.7890000 |
| H | -0.3850000 | 4.4740000 | -3.9210000 |

<sup>5</sup>TS4<sub>b1</sub>

E=-2747.094394 (a.u.)

|   |            |            |            |
|---|------------|------------|------------|
| C | 2.6030000  | 14.1630000 | -6.1820000 |
| H | 1.5520000  | 14.1560000 | -6.4930000 |
| H | 3.2080000  | 14.2980000 | -7.0830000 |
| C | 2.9570000  | 12.8770000 | -5.4550000 |
| C | 2.0780000  | 12.3240000 | -4.5130000 |
| H | 1.1280000  | 12.8140000 | -4.3080000 |
| C | 2.4020000  | 11.1700000 | -3.8110000 |
| H | 1.7120000  | 10.7790000 | -3.0700000 |
| C | 3.6200000  | 10.5140000 | -4.0520000 |
| O | 3.9520000  | 9.3640000  | -3.4110000 |
| H | 3.0910000  | 8.8520000  | -3.1080000 |
| C | 4.1820000  | 12.2290000 | -5.6690000 |
| H | 4.8850000  | 12.6410000 | -6.3910000 |
| C | 4.5130000  | 11.0590000 | -4.9850000 |
| H | 5.4550000  | 10.5490000 | -5.1680000 |
| C | 1.2580000  | 9.6090000  | 3.8190000  |
| H | 0.2080000  | 9.3070000  | 3.8610000  |
| H | 1.4470000  | 10.2760000 | 4.6610000  |
| C | 1.5320000  | 10.3140000 | 2.4830000  |
| H | 1.1830000  | 11.3500000 | 2.5900000  |
| H | 2.6070000  | 10.4020000 | 2.2760000  |
| C | 0.8230000  | 9.6970000  | 1.2730000  |
| H | 1.1910000  | 8.6810000  | 1.0810000  |
| H | -0.2500000 | 9.6030000  | 1.4960000  |
| C | 0.9840000  | 10.5750000 | 0.0290000  |
| H | 0.7690000  | 11.6100000 | 0.3250000  |
| H | 2.0260000  | 10.5770000 | -0.3090000 |
| N | 0.1320000  | 10.2370000 | -1.1280000 |
| H | -0.8260000 | 10.0980000 | -0.7910000 |
| H | 0.4520000  | 9.3500000  | -1.5260000 |

|   |             |             |             |
|---|-------------|-------------|-------------|
| C | 5.04900000  | -0.91200000 | 2.97700000  |
| H | 5.89200000  | -0.24000000 | 2.80500000  |
| H | 5.44300000  | -1.92400000 | 3.06200000  |
| N | 3.22600000  | -1.94700000 | 1.59500000  |
| H | 3.13300000  | -2.75100000 | 2.22100000  |
| C | 4.11400000  | -0.90500000 | 1.80800000  |
| C | 2.55600000  | -1.72200000 | 0.45000000  |
| H | 1.82800000  | -2.40900000 | 0.04700000  |
| N | 2.95700000  | -0.57600000 | -0.10500000 |
| C | 3.93600000  | -0.06900000 | 0.73900000  |
| H | 4.45600000  | 0.84700000  | 0.52000000  |
| C | 7.40700000  | 2.24300000  | -2.05700000 |
| H | 7.73800000  | 3.15300000  | -2.57000000 |
| H | 7.72500000  | 1.40000000  | -2.67700000 |
| N | 5.16100000  | 3.21100000  | -1.34200000 |
| H | 5.49200000  | 4.08000000  | -0.86500000 |
| C | 5.92400000  | 2.20700000  | -1.91100000 |
| C | 3.87400000  | 2.81900000  | -1.34200000 |
| H | 3.07100000  | 3.38900000  | -0.90000000 |
| N | 3.75600000  | 1.62200000  | -1.90400000 |
| C | 5.03000000  | 1.23100000  | -2.26500000 |
| H | 5.22100000  | 0.28500000  | -2.74800000 |
| C | 3.84900000  | -4.46100000 | -3.98000000 |
| H | 3.65800000  | -4.91400000 | -4.95800000 |
| H | 3.46000000  | -5.12600000 | -3.20100000 |
| N | 2.10800000  | -2.75800000 | -4.65700000 |
| H | 1.80100000  | -3.29100000 | -5.50200000 |
| C | 3.16300000  | -3.13600000 | -3.84800000 |
| C | 1.61600000  | -1.59000000 | -4.20500000 |
| H | 0.79100000  | -1.05200000 | -4.64800000 |
| N | 2.30700000  | -1.18400000 | -3.13500000 |
| C | 3.27200000  | -2.15200000 | -2.90200000 |
| H | 3.93000000  | -2.10400000 | -2.04800000 |
| C | -2.23200000 | -0.49600000 | 1.89100000  |
| H | -2.07400000 | 0.41200000  | 2.47300000  |
| H | -2.05800000 | -1.35700000 | 2.54100000  |
| N | -1.23400000 | -1.53000000 | -0.20600000 |
| H | -1.77200000 | -2.42800000 | -0.18200000 |
| C | -1.30600000 | -0.49300000 | 0.70900000  |
| C | -0.34200000 | -1.21600000 | -1.15600000 |
| H | -0.08300000 | -1.88600000 | -1.96300000 |
| N | 0.19200000  | -0.01800000 | -0.90800000 |
| C | -0.40600000 | 0.44100000  | 0.25500000  |
| H | -0.15400000 | 1.40000000  | 0.68400000  |

|    |             |             |             |
|----|-------------|-------------|-------------|
| Fe | 2.00100000  | 0.44500000  | -1.84800000 |
| O  | 1.21500000  | 1.77900000  | -3.05400000 |
| O  | -0.06400000 | 1.27200000  | -4.27900000 |
| C  | 0.07000000  | 0.10800000  | -8.29200000 |
| O  | -0.97400000 | -0.02600000 | -9.14500000 |
| H  | -0.86500000 | -0.80500000 | -9.73900000 |
| C  | 2.25600000  | -0.46600000 | -7.43600000 |
| O  | 3.40300000  | -1.20600000 | -7.44500000 |
| H  | 3.21900000  | -2.15000000 | -7.68100000 |
| C  | 1.85000000  | 6.83600000  | -3.16400000 |
| O  | 1.86000000  | 8.11400000  | -2.80800000 |
| C  | 0.99100000  | 1.30900000  | -6.39800000 |
| C  | 0.64600000  | 2.13700000  | -5.18400000 |
| H  | 0.00300000  | 2.97500000  | -5.48600000 |
| C  | 1.73400000  | 2.58900000  | -4.19200000 |
| H  | 2.73600000  | 2.23500000  | -4.44500000 |
| C  | 1.78000000  | 4.05600000  | -3.86600000 |
| C  | 1.21200000  | -0.69700000 | -8.34000000 |
| H  | 1.30200000  | -1.47600000 | -9.09000000 |
| C  | 2.16300000  | 0.55100000  | -6.48200000 |
| H  | 2.98200000  | 0.67400000  | -5.78500000 |
| C  | -0.04300000 | 1.10200000  | -7.31300000 |
| H  | -0.97100000 | 1.66100000  | -7.24500000 |
| C  | 2.99700000  | 4.74600000  | -3.74900000 |
| H  | 3.93200000  | 4.21700000  | -3.91700000 |
| C  | 3.04100000  | 6.10000000  | -3.41100000 |
| H  | 4.00000000  | 6.59800000  | -3.29300000 |
| C  | 0.62400000  | 6.14300000  | -3.34800000 |
| H  | -0.30200000 | 6.69500000  | -3.20900000 |
| C  | 0.59800000  | 4.79600000  | -3.67100000 |
| H  | -0.36000000 | 4.30400000  | -3.78700000 |

<sup>5</sup>IM4bi

E=-2747.114208 (a.u.)

|   |            |             |             |
|---|------------|-------------|-------------|
| C | 2.67500000 | 14.17800000 | -6.25500000 |
| H | 1.62700000 | 14.15600000 | -6.57700000 |
| H | 3.28300000 | 14.35300000 | -7.14700000 |
| C | 3.05100000 | 12.88200000 | -5.55800000 |
| C | 2.18000000 | 12.29900000 | -4.62900000 |
| H | 1.22300000 | 12.77400000 | -4.42300000 |
| C | 2.51300000 | 11.13700000 | -3.94700000 |
| H | 1.82700000 | 10.72600000 | -3.21500000 |
| C | 3.73600000 | 10.49200000 | -4.20000000 |

|   |             |             |             |
|---|-------------|-------------|-------------|
| O | 4.06800000  | 9.33000000  | -3.59000000 |
| H | 3.19500000  | 8.81800000  | -3.27700000 |
| C | 4.28400000  | 12.25200000 | -5.78100000 |
| H | 4.98500000  | 12.68500000 | -6.49200000 |
| C | 4.62500000  | 11.07200000 | -5.12000000 |
| H | 5.57400000  | 10.57600000 | -5.31100000 |
| C | 1.19300000  | 9.77000000  | 3.70800000  |
| H | 0.13400000  | 9.49300000  | 3.75400000  |
| H | 1.40100000  | 10.41800000 | 4.56000000  |
| C | 1.47600000  | 10.50400000 | 2.38600000  |
| H | 1.14000000  | 11.54100000 | 2.52300000  |
| H | 2.55300000  | 10.58200000 | 2.18700000  |
| C | 0.76200000  | 9.93700000  | 1.15400000  |
| H | 1.14800000  | 8.93900000  | 0.91400000  |
| H | -0.30700000 | 9.81900000  | 1.38300000  |
| C | 0.89400000  | 10.86100000 | -0.06300000 |
| H | 0.60500000  | 11.87600000 | 0.23700000  |
| H | 1.94100000  | 10.92100000 | -0.38000000 |
| N | 0.08300000  | 10.49600000 | -1.24600000 |
| H | -0.88700000 | 10.36700000 | -0.93500000 |
| H | 0.40900000  | 9.58900000  | -1.58700000 |
| C | 5.10300000  | -0.88900000 | 3.01000000  |
| H | 5.95000000  | -0.22100000 | 2.84200000  |
| H | 5.48900000  | -1.90500000 | 3.09500000  |
| N | 3.28600000  | -1.91700000 | 1.61300000  |
| H | 3.20500000  | -2.73900000 | 2.21900000  |
| C | 4.16700000  | -0.87300000 | 1.84500000  |
| C | 2.58000000  | -1.66000000 | 0.50200000  |
| H | 1.85400000  | -2.34200000 | 0.08800000  |
| N | 2.95700000  | -0.48600000 | -0.01400000 |
| C | 3.95800000  | 0.00200000  | 0.81700000  |
| H | 4.46800000  | 0.92700000  | 0.62100000  |
| C | 7.44000000  | 2.15200000  | -2.07800000 |
| H | 7.73400000  | 3.05600000  | -2.62300000 |
| H | 7.77600000  | 1.30300000  | -2.68000000 |
| N | 5.18900000  | 3.10500000  | -1.37800000 |
| H | 5.50600000  | 4.00200000  | -0.94700000 |
| C | 5.95900000  | 2.08300000  | -1.91100000 |
| C | 3.91200000  | 2.69900000  | -1.33300000 |
| H | 3.09600000  | 3.27700000  | -0.92800000 |
| N | 3.80500000  | 1.46800000  | -1.83000000 |
| C | 5.07600000  | 1.07200000  | -2.19800000 |
| H | 5.26600000  | 0.10300000  | -2.63200000 |
| C | 3.88700000  | -4.44400000 | -3.90200000 |

|    |             |             |             |
|----|-------------|-------------|-------------|
| H  | 3.67600000  | -4.88000000 | -4.88400000 |
| H  | 3.51300000  | -5.12700000 | -3.13000000 |
| N  | 2.09100000  | -2.77300000 | -4.47000000 |
| H  | 1.76900000  | -3.28000000 | -5.32200000 |
| C  | 3.20200000  | -3.12300000 | -3.73200000 |
| C  | 1.59700000  | -1.62000000 | -3.96800000 |
| H  | 0.72500000  | -1.11400000 | -4.35200000 |
| N  | 2.33800000  | -1.19600000 | -2.94500000 |
| C  | 3.34200000  | -2.13400000 | -2.79000000 |
| H  | 4.05300000  | -2.08100000 | -1.97900000 |
| C  | -2.16200000 | -0.49600000 | 1.85800000  |
| H  | -1.97500000 | 0.41200000  | 2.43300000  |
| H  | -2.00200000 | -1.35600000 | 2.51400000  |
| N  | -1.17600000 | -1.58000000 | -0.22500000 |
| H  | -1.74400000 | -2.46000000 | -0.19900000 |
| C  | -1.23700000 | -0.52800000 | 0.67600000  |
| C  | -0.23400000 | -1.32500000 | -1.14400000 |
| H  | 0.02900000  | -2.01600000 | -1.92900000 |
| N  | 0.33500000  | -0.14900000 | -0.88600000 |
| C  | -0.28700000 | 0.36400000  | 0.24200000  |
| H  | -0.01100000 | 1.32100000  | 0.65900000  |
| Fe | 2.05000000  | 0.55300000  | -1.57600000 |
| O  | 1.29100000  | 1.96600000  | -2.36100000 |
| O  | -0.29700000 | 0.98700000  | -4.10500000 |
| C  | 0.00200000  | 0.25100000  | -7.95200000 |
| O  | -1.02000000 | 0.16000000  | -8.83900000 |
| H  | -0.84200000 | -0.53100000 | -9.52000000 |
| C  | 2.19200000  | -0.33200000 | -7.10400000 |
| O  | 3.34500000  | -1.05400000 | -7.14800000 |
| H  | 3.17800000  | -1.96700000 | -7.49100000 |
| C  | 1.88900000  | 6.84500000  | -3.19900000 |
| O  | 1.95900000  | 8.15300000  | -2.96400000 |
| C  | 0.85400000  | 1.29900000  | -5.93400000 |
| C  | 0.44700000  | 2.02200000  | -4.63900000 |
| H  | -0.18600000 | 2.88400000  | -4.90100000 |
| C  | 1.58600000  | 2.49200000  | -3.66200000 |
| H  | 2.55100000  | 2.10300000  | -4.00000000 |
| C  | 1.69000000  | 4.00600000  | -3.58400000 |
| C  | 1.17400000  | -0.50200000 | -8.05300000 |
| H  | 1.31000000  | -1.20400000 | -8.87000000 |
| C  | 2.05200000  | 0.58700000  | -6.06300000 |
| H  | 2.85200000  | 0.65700000  | -5.33700000 |
| C  | -0.16900000 | 1.13100000  | -6.87800000 |
| H  | -1.12400000 | 1.62900000  | -6.75300000 |



|   |             |            |             |
|---|-------------|------------|-------------|
| C | 2.91300000  | 4.67600000 | -3.72500000 |
| H | 3.80900000  | 4.11000000 | -3.97100000 |
| C | 3.02100000  | 6.05800000 | -3.53500000 |
| H | 3.99600000  | 6.53800000 | -3.60000000 |
| C | 0.64400000  | 6.17000000 | -3.14700000 |
| H | -0.24800000 | 6.75900000 | -2.94800000 |
| C | 0.56100000  | 4.79400000 | -3.29900000 |
| H | -0.40100000 | 4.30900000 | -3.18800000 |

<sup>5</sup>TS5<sub>b1</sub>

E=-2747.105636 (a.u.)

|   |             |             |             |
|---|-------------|-------------|-------------|
| C | 2.67700000  | 14.17900000 | -6.25900000 |
| H | 1.63100000  | 14.15700000 | -6.58400000 |
| H | 3.28800000  | 14.35500000 | -7.14900000 |
| C | 3.05200000  | 12.88100000 | -5.56400000 |
| C | 2.18100000  | 12.29700000 | -4.63600000 |
| H | 1.22400000  | 12.77300000 | -4.42800000 |
| C | 2.51300000  | 11.13400000 | -3.95500000 |
| H | 1.82700000  | 10.72300000 | -3.22400000 |
| C | 3.73600000  | 10.49100000 | -4.21000000 |
| O | 4.07000000  | 9.32700000  | -3.59900000 |
| H | 3.20300000  | 8.82400000  | -3.29000000 |
| C | 4.28500000  | 12.25000000 | -5.78800000 |
| H | 4.98600000  | 12.68300000 | -6.49900000 |
| C | 4.62500000  | 11.06900000 | -5.12900000 |
| H | 5.57300000  | 10.57200000 | -5.32100000 |
| C | 1.19300000  | 9.77100000  | 3.70900000  |
| H | 0.13400000  | 9.49500000  | 3.75300000  |
| H | 1.40200000  | 10.41800000 | 4.56100000  |
| C | 1.47800000  | 10.50600000 | 2.38800000  |
| H | 1.14500000  | 11.54300000 | 2.52600000  |
| H | 2.55500000  | 10.58100000 | 2.18800000  |
| C | 0.76100000  | 9.94200000  | 1.15600000  |
| H | 1.14600000  | 8.94300000  | 0.91500000  |
| H | -0.30800000 | 9.82500000  | 1.38700000  |
| C | 0.89100000  | 10.86600000 | -0.06100000 |
| H | 0.60100000  | 11.88100000 | 0.23900000  |
| H | 1.93800000  | 10.92700000 | -0.38100000 |
| N | 0.07800000  | 10.50000000 | -1.24300000 |
| H | -0.89200000 | 10.37200000 | -0.93100000 |
| H | 0.40100000  | 9.59200000  | -1.58400000 |
| C | 5.13100000  | -0.90100000 | 3.04100000  |
| H | 5.97300000  | -0.22700000 | 2.87100000  |

|    |             |             |             |
|----|-------------|-------------|-------------|
| H  | 5.52600000  | -1.91200000 | 3.13200000  |
| N  | 3.31900000  | -1.94200000 | 1.64600000  |
| H  | 3.23600000  | -2.76200000 | 2.25600000  |
| C  | 4.19900000  | -0.89700000 | 1.87400000  |
| C  | 2.61300000  | -1.69000000 | 0.53400000  |
| H  | 1.88900000  | -2.37400000 | 0.12000000  |
| N  | 2.99100000  | -0.51800000 | 0.01500000  |
| C  | 3.99200000  | -0.02600000 | 0.84400000  |
| H  | 4.50300000  | 0.89800000  | 0.64400000  |
| C  | 7.45900000  | 2.14900000  | -2.07600000 |
| H  | 7.74900000  | 3.05600000  | -2.61900000 |
| H  | 7.79800000  | 1.30200000  | -2.67800000 |
| N  | 5.20900000  | 3.09600000  | -1.37100000 |
| H  | 5.52300000  | 3.99800000  | -0.94600000 |
| C  | 5.97900000  | 2.07500000  | -1.90300000 |
| C  | 3.93500000  | 2.68300000  | -1.30900000 |
| H  | 3.12100000  | 3.26000000  | -0.89800000 |
| N  | 3.83100000  | 1.44600000  | -1.79500000 |
| C  | 5.10100000  | 1.05600000  | -2.17400000 |
| H  | 5.29300000  | 0.08500000  | -2.60300000 |
| C  | 3.86100000  | -4.41700000 | -3.92100000 |
| H  | 3.64800000  | -4.84200000 | -4.90700000 |
| H  | 3.48000000  | -5.10500000 | -3.15600000 |
| N  | 2.07300000  | -2.72300000 | -4.47000000 |
| H  | 1.74500000  | -3.22600000 | -5.32200000 |
| C  | 3.18400000  | -3.09300000 | -3.73900000 |
| C  | 1.59000000  | -1.57000000 | -3.95500000 |
| H  | 0.72300000  | -1.04500000 | -4.32700000 |
| N  | 2.34200000  | -1.16700000 | -2.92900000 |
| C  | 3.33900000  | -2.11600000 | -2.78800000 |
| H  | 4.05300000  | -2.08000000 | -1.97900000 |
| C  | -2.15700000 | -0.49300000 | 1.85600000  |
| H  | -1.97000000 | 0.41300000  | 2.43200000  |
| H  | -2.00100000 | -1.35500000 | 2.51200000  |
| N  | -1.16100000 | -1.58000000 | -0.22200000 |
| H  | -1.73600000 | -2.45500000 | -0.20300000 |
| C  | -1.22300000 | -0.52900000 | 0.68100000  |
| C  | -0.20600000 | -1.33400000 | -1.12900000 |
| H  | 0.06100000  | -2.02400000 | -1.91300000 |
| N  | 0.37100000  | -0.16300000 | -0.86000000 |
| C  | -0.26100000 | 0.35500000  | 0.26100000  |
| H  | 0.02000000  | 1.30900000  | 0.68200000  |
| Fe | 2.08600000  | 0.52400000  | -1.53500000 |
| O  | 1.31000000  | 1.97000000  | -2.32000000 |

|   |             |             |             |
|---|-------------|-------------|-------------|
| O | -0.43200000 | 1.15300000  | -4.00800000 |
| C | 0.02400000  | 0.19900000  | -8.07500000 |
| O | -0.97800000 | 0.09200000  | -8.98700000 |
| H | -0.80200000 | -0.62800000 | -9.63500000 |
| C | 2.18200000  | -0.35900000 | -7.15600000 |
| O | 3.34600000  | -1.07500000 | -7.15200000 |
| H | 3.18800000  | -1.99400000 | -7.48100000 |
| C | 1.87500000  | 6.84200000  | -3.19600000 |
| O | 1.94200000  | 8.14800000  | -2.97700000 |
| C | 0.78500000  | 1.25200000  | -6.02200000 |
| C | 0.25500000  | 1.94000000  | -4.76600000 |
| H | -0.18100000 | 2.93500000  | -4.97700000 |
| C | 1.64100000  | 2.51400000  | -3.53200000 |
| H | 2.51200000  | 2.05600000  | -4.00400000 |
| C | 1.69800000  | 4.00300000  | -3.52400000 |
| C | 1.20400000  | -0.54700000 | -8.13700000 |
| H | 1.37200000  | -1.24800000 | -8.94900000 |
| C | 1.99600000  | 0.56500000  | -6.12100000 |
| H | 2.77000000  | 0.63100000  | -5.36600000 |
| C | -0.18400000 | 1.09000000  | -7.01800000 |
| H | -1.15100000 | 1.57500000  | -6.93700000 |
| C | 2.90500000  | 4.68600000  | -3.75600000 |
| H | 3.79200000  | 4.12500000  | -4.04500000 |
| C | 3.00300000  | 6.06800000  | -3.58200000 |
| H | 3.96500000  | 6.56200000  | -3.69900000 |
| C | 0.64000000  | 6.15100000  | -3.07400000 |
| H | -0.24900000 | 6.73800000  | -2.85400000 |
| C | 0.57100000  | 4.77300000  | -3.18000000 |
| H | -0.36900000 | 4.26000000  | -3.01300000 |

<sup>5</sup>Pbl

E=-2747.237887 (a.u.)

|   |            |             |             |
|---|------------|-------------|-------------|
| C | 2.69000000 | 14.20200000 | -6.31100000 |
| H | 1.65300000 | 14.20100000 | -6.66700000 |
| H | 3.33300000 | 14.37200000 | -7.17800000 |
| C | 3.01500000 | 12.90800000 | -5.59100000 |
| C | 2.08100000 | 12.34400000 | -4.71400000 |
| H | 1.10000000 | 12.80400000 | -4.60800000 |
| C | 2.38600000 | 11.23000000 | -3.94700000 |
| H | 1.65300000 | 10.83800000 | -3.25300000 |
| C | 3.65100000 | 10.63100000 | -4.05400000 |
| O | 3.97400000 | 9.54200000  | -3.31400000 |
| H | 3.10500000 | 9.04200000  | -3.08000000 |

|   |             |             |             |
|---|-------------|-------------|-------------|
| C | 4.27400000  | 12.30000000 | -5.69300000 |
| H | 5.01900000  | 12.72100000 | -6.36500000 |
| C | 4.59400000  | 11.17200000 | -4.93800000 |
| H | 5.56700000  | 10.69500000 | -5.02000000 |
| C | 1.19100000  | 9.80200000  | 3.78000000  |
| H | 0.13300000  | 9.52300000  | 3.80700000  |
| H | 1.39000000  | 10.42600000 | 4.65100000  |
| C | 1.48700000  | 10.57200000 | 2.48200000  |
| H | 1.16600000  | 11.60900000 | 2.64900000  |
| H | 2.56600000  | 10.64300000 | 2.28600000  |
| C | 0.77100000  | 10.05400000 | 1.23100000  |
| H | 1.14100000  | 9.05500000  | 0.96700000  |
| H | -0.30100000 | 9.94900000  | 1.45000000  |
| C | 0.92800000  | 11.00700000 | 0.03900000  |
| H | 0.67500000  | 12.02200000 | 0.37000000  |
| H | 1.97600000  | 11.04000000 | -0.28100000 |
| N | 0.10300000  | 10.70700000 | -1.14700000 |
| H | -0.86900000 | 10.57400000 | -0.84600000 |
| H | 0.41200000  | 9.82400000  | -1.55700000 |
| C | 5.17100000  | -0.94600000 | 3.11200000  |
| H | 5.98600000  | -0.24300000 | 2.92600000  |
| H | 5.61200000  | -1.93600000 | 3.23200000  |
| N | 3.38500000  | -2.07900000 | 1.75100000  |
| H | 3.29000000  | -2.86200000 | 2.40300000  |
| C | 4.25100000  | -1.01500000 | 1.93900000  |
| C | 2.72600000  | -1.89800000 | 0.59000000  |
| H | 2.01400000  | -2.60800000 | 0.19600000  |
| N | 3.11200000  | -0.76500000 | 0.00900000  |
| C | 4.06800000  | -0.21400000 | 0.84700000  |
| H | 4.57700000  | 0.70400000  | 0.61000000  |
| C | 7.54100000  | 2.22800000  | -1.98100000 |
| H | 7.83500000  | 3.15600000  | -2.48400000 |
| H | 7.87500000  | 1.40600000  | -2.62000000 |
| N | 5.27400000  | 3.13300000  | -1.25800000 |
| H | 5.57600000  | 4.02500000  | -0.80200000 |
| C | 6.06100000  | 2.14400000  | -1.81700000 |
| C | 4.00300000  | 2.69300000  | -1.22100000 |
| H | 3.19000000  | 3.24400000  | -0.77300000 |
| N | 3.91200000  | 1.48000000  | -1.75500000 |
| C | 5.19300000  | 1.12900000  | -2.13200000 |
| H | 5.40800000  | 0.17700000  | -2.59300000 |
| C | 3.93100000  | -4.57600000 | -3.95300000 |
| H | 3.74300000  | -5.03600000 | -4.92800000 |
| H | 3.56000000  | -5.24400000 | -3.16800000 |

|    |             |             |             |
|----|-------------|-------------|-------------|
| N  | 2.24400000  | -2.82800000 | -4.67200000 |
| H  | 1.93000000  | -3.35900000 | -5.51300000 |
| C  | 3.24200000  | -3.25500000 | -3.82000000 |
| C  | 1.77900000  | -1.64400000 | -4.22000000 |
| H  | 1.00000000  | -1.07900000 | -4.70600000 |
| N  | 2.42500000  | -1.28400000 | -3.11100000 |
| C  | 3.33900000  | -2.28900000 | -2.85300000 |
| H  | 3.96200000  | -2.27700000 | -1.97200000 |
| C  | -2.25600000 | -0.48100000 | 1.82400000  |
| H  | -2.08900000 | 0.42600000  | 2.40500000  |
| H  | -2.11100000 | -1.34000000 | 2.48500000  |
| N  | -1.18700000 | -1.58900000 | -0.19500000 |
| H  | -1.73500000 | -2.48000000 | -0.15900000 |
| C  | -1.29800000 | -0.51300000 | 0.66900000  |
| C  | -0.24700000 | -1.31900000 | -1.11300000 |
| H  | 0.04700000  | -2.02500000 | -1.87700000 |
| N  | 0.27700000  | -0.11100000 | -0.89800000 |
| C  | -0.37500000 | 0.40000000  | 0.21500000  |
| H  | -0.13200000 | 1.37100000  | 0.62100000  |
| Fe | 2.16700000  | 0.27700000  | -1.69400000 |
| O  | 1.37600000  | 1.95800000  | -3.14500000 |
| O  | 1.75300000  | 3.65900000  | -6.48800000 |
| C  | -0.20700000 | -0.22200000 | -8.43600000 |
| O  | -1.28300000 | -0.65300000 | -9.12800000 |
| H  | -1.08800000 | -1.45700000 | -9.66500000 |
| C  | 2.04100000  | -0.47900000 | -7.53400000 |
| O  | 3.18100000  | -1.18300000 | -7.33000000 |
| H  | 3.08500000  | -2.13800000 | -7.57100000 |
| C  | 1.86700000  | 7.03800000  | -3.12100000 |
| O  | 1.79400000  | 8.31700000  | -2.85100000 |
| C  | 0.83900000  | 1.58700000  | -7.23800000 |
| C  | 0.79500000  | 3.00500000  | -6.87400000 |
| H  | -0.19700000 | 3.48900000  | -7.00800000 |
| C  | 2.18100000  | 2.78600000  | -3.60600000 |
| H  | 3.11100000  | 2.43700000  | -4.08600000 |
| C  | 2.03800000  | 4.22300000  | -3.51500000 |
| C  | 0.94600000  | -0.99100000 | -8.24900000 |
| H  | 0.98300000  | -1.98500000 | -8.67800000 |
| C  | 1.99800000  | 0.82700000  | -7.03800000 |
| H  | 2.86400000  | 1.25300000  | -6.54300000 |
| C  | -0.27800000 | 1.06200000  | -7.89300000 |
| H  | -1.17800000 | 1.65100000  | -8.03300000 |
| C  | 3.14500000  | 5.05600000  | -3.78400000 |
| H  | 4.07400000  | 4.60800000  | -4.13000000 |

|   |             |            |             |
|---|-------------|------------|-------------|
| C | 3.07400000  | 6.42500000 | -3.58300000 |
| H | 3.94500000  | 7.05400000 | -3.74200000 |
| C | 0.72600000  | 6.19200000 | -2.97300000 |
| H | -0.21700000 | 6.66300000 | -2.70900000 |
| C | 0.82900000  | 4.82400000 | -3.10900000 |
| H | -0.01600000 | 4.17300000 | -2.92100000 |
